1 **RESEARCH ARTICLE**

2

3 **Title:** The core root microbiome of *Spartina alterniflora* is predominated by sulfur-oxidizing and  
4 sulfate-reducing bacteria in Georgia salt marshes, USA

5

6 **Authors:** Rolando, Jose L.<sup>a</sup>; Kolton, Max<sup>a</sup>; Song, Tianze<sup>a</sup>; Kostka, J.E.<sup>a,b,c</sup>

7

8 **Affiliation:**

9 <sup>a</sup>Georgia Institute of Technology, School of Biological Sciences, Atlanta, GA 30332, USA

10 <sup>b</sup>Georgia Institute of Technology, School of Earth and Atmospheric Sciences, Atlanta, GA 30332,  
11 USA

12 <sup>c</sup>Center for Microbial Dynamics and Infection, Georgia Institute of Technology, Atlanta, GA  
13 30332, USA

14

15 **Corresponding author:**

16 Kostka, JE. e-mail: joel.kostka@biology.gatech.edu

17

18

19

20

21 **Abstract**

22 Background: Salt marshes are dominated by the smooth cordgrass *Spartina alterniflora* on the US  
23 Atlantic and Gulf of Mexico coastlines. Although soil microorganisms are well known to mediate  
24 important biogeochemical cycles in salt marshes, little is known about the role of root microbiomes  
25 in supporting the health and productivity of marsh plant hosts. Leveraging *in situ* gradients in  
26 aboveground plant biomass as a natural laboratory, we investigated the relationships between *S.*  
27 *alterniflora* primary productivity, sediment redox potential, and the physiological ecology of bulk  
28 sediment, rhizosphere, and root microbial communities at two Georgia barrier islands over two  
29 growing seasons.

30 Results: A marked decrease in prokaryotic alpha diversity with high abundance and increased  
31 phylogenetic dispersion was found in the *S. alterniflora* root microbiome. Significantly higher  
32 rates of enzymatic organic matter decomposition, as well as the relative abundances of putative  
33 sulfur (S)-oxidizing, sulfate-reducing, and nitrifying prokaryotes correlated with plant  
34 productivity. Moreover, these functional guilds were overrepresented in the *S. alterniflora*  
35 rhizosphere and root core microbiomes. Core microbiome bacteria from the *Candidatus*  
36 Thiodiazotropha genus, with the metabolic potential to couple S oxidation with C and N fixation,  
37 were shown to be highly abundant in the root and rhizosphere of *S. alterniflora*.

38 Conclusions: The *S. alterniflora* root microbiome is dominated by highly active and competitive  
39 species taking advantage of available carbon substrates in the oxidized root zone. Two microbially-  
40 mediated mechanisms are proposed to stimulate *S. alterniflora* primary productivity: (i.) Enhanced  
41 microbial activity replenishes nutrients and terminal electron acceptors in higher biomass stands,  
42 and (ii.) coupling of chemolithotrophic S oxidation with carbon (C) and nitrogen (N) fixation by  
43 root and rhizosphere associated prokaryotes detoxify sulfide in the root zone while potentially  
44 transferring fixed C and N to the host plant.

45

46 **Key words:** *Spartina alterniflora*, salt marsh, rhizosphere, microbiome, root, biogeochemical  
47 cycles, sulfur oxidation, sulfate reduction

48

49

## 50 **1. Background:**

51 Salt marsh ecosystems are structured by intertidal plant communities at the land-sea interface. Salt  
52 marshes are mostly distributed outside of the tropics and comprise a global area of ~5.5 Mha, with  
53 approximately 30% of its area located in the continental USA (Mcowen et al., 2017). On the US  
54 coastlines of the Atlantic Ocean and Gulf of Mexico, salt marshes are dominated by the smooth  
55 cordgrass *Spartina alterniflora* (Mitsch and Gosselink, 1993). Salt marsh ecosystems are  
56 biogeochemical hotspots characterized by high rates of primary productivity, organic matter  
57 mineralization, and nutrient cycling (Howarth, 1984; Kostka et al., 2002a; Kirwan et al., 2009).  
58 As a consequence of their high biological activity, *S. alterniflora* dominated salt marshes provide  
59 a broad range of ecosystem services to local and global human populations (Barbier et al., 2011).  
60 Ecosystem services provided by salt marshes include estuarine water purification, coastal  
61 protection from storm surges, sediment erosion control, maintenance of fisheries, carbon  
62 sequestration, and much more (Barbier et al., 2011, Hopkinson et al., 2019).

63 At the local scale, bottom-up control of *S. alterniflora* primary productivity has been associated  
64 with nitrogen (N) uptake kinetics (Mendelssohn and Morris, 2000). Low sediment redox potential  
65 and high sulfide concentration have been shown to reduce *S. alterniflora*' root energy status,  
66 decreasing the plant's available energy for N uptake (Morris and Dacey, 1984; Bradley and Morris,  
67 1990; Koch et al., 1990; Mendelssohn and McKee, 1992). Thus, naturally occurring gradients of  
68 *S. alterniflora* primary productivity are usually found as a function of the plant's distance to large  
69 tidal creeks (Valiela et al., 1978). Sediments at closer proximity to large tidal creeks are flushed  
70 more frequently; supplying oxygen, exchanging porewater nutrients, and oxidizing toxic metabolic  
71 products such as sulfide. Conversely, areas in the interior of the marsh tend to be stagnant,  
72 accumulating chemically reduced and toxic compounds in their interstitial porewater. The  
73 microbial mediation of major biogeochemical cycles along this natural gradient in aboveground *S.*  
74 *alterniflora* biomass has been extensively studied (Kostka et al., 2002a; Koretsky et al., 2003;  
75 Dollhopf et al., 2005; Hyun et al., 2007; Tobias and Neubauer, 2019; Murphy et al., 2020).  
76 However, the relationship between root-microbial interactions and *S. alterniflora* primary  
77 productivity has not been characterized in detail.

78 Biogeochemical evidence points to tightly coupled interactions between *S. alterniflora* and  
79 microbial activity in the root zone, which facilitate the rapid exchange of electron ( $e^-$ ) acceptors

80 (O<sub>2</sub>, NO<sub>3</sub>, Fe<sup>3+</sup>) and donors (e.g., rhizodeposits, reduced sulfur compounds). For example, reduced  
81 sulfur compounds such as pyrite store high amounts of chemically reduced energy, and their  
82 oxidation has long been hypothesized to be an important process limiting the energy flow of salt  
83 marsh ecosystems (Howarth, 1984). Part of this energy has been speculated to be used to enhance  
84 plant growth (Howarth 1984, Morris et al., 1996), similar to the well-known symbiotic relationship  
85 between invertebrates and autotrophic sulfur-oxidizing bacteria in marine ecosystems (Dubilier et  
86 al., 2008). However, the *S. alterniflora* root-associated microbiome remains largely unexplored.

87 Most previous studies investigating the *S. alterniflora* root microbiome focused on understanding  
88 the factors influencing the activity and taxonomic diversity of root-associated nitrogen-fixing  
89 bacteria or diazotrophs (Whiting et al., 1986; Gandy and Yoch, 1988; Lovell et al., 2000; Brown  
90 et al., 2003; Davis et al., 2011). A few reports of other functional guilds have shown that  
91 chemolithoautotrophs conserving energy through of S, Fe, and ammonium oxidation are also  
92 enriched in the *S. alterniflora* root zone when compared to bulk sediment (Thomas et al., 2014;  
93 Zheng et al., 2016; Kolton et al., 2020). A drawback of these previous studies is that the majority  
94 did not thoroughly separate the root-associated compartment from the surrounding rhizospheric  
95 sediment (e.g., Thomas et al., 2014; Zogg et al., 2018; Kolton et al., 2020). Thus, the ecology of  
96 the closely associated *S. alterniflora* root microbiome, and its interaction with the plant host still  
97 represents an important knowledge gap to be addressed. In other plants, root microbial  
98 communities have been shown to be key players in improving plant resistance to biotic and abiotic  
99 stress, outcompeting soil-borne pathogens, modulating plant development, and transferring  
100 nutrients for plant uptake (Liu et al., 2019; White et al., 2019; Zhang et al., 2020).

101 To gain a predictive understanding of the beneficial interactions between a host plant and its  
102 associated root microbiome, the ecology and potential physiology of its core microbiome must be  
103 investigated. A host's core microbiome is composed of microbial taxa consistently found  
104 associated with host individuals and hypothesized to perform key functions in healthy host-  
105 microbiome systems (Shade and Handelsman, 2011). The *S. alterniflora* core root microbiome has  
106 yet to be defined. Understanding of *S. alterniflora* root microbiome could pave the way to  
107 harnessing plant-microbe interactions for the adaptive management and restoration of salt marsh  
108 habitats.

109 Thus, this study sought to elucidate the plant-microbe interactions linked to *S. alterniflora* primary  
110 productivity over the course of 2 years at 2 sites in GA, USA. The objectives of the study were to:  
111 1) Evaluate the taxa that constitute the *S. alterniflora* rhizosphere and root core microbiome in  
112 GA, USA 2) Characterize the potential metabolism, physiology, and ecology of the prokaryotic  
113 taxa enriched at closer proximities to *S. alterniflora* roots along primary productivity gradients. 3)  
114 Propose a mechanistic understanding of the relationship between *S. alterniflora* and its root-  
115 associated prokaryotic community.

116

## 117 **2. Results**

### 118 2.1 Primary productivity gradient

119 Eight transects along a *S. alterniflora* primary productivity gradient were studied in two barrier  
120 islands in the state of Georgia, USA. A total of 24 sampling points were established and sampled  
121 during the years 2018 and 2019 in the Georgia Coastal Ecosystem - Long Term Ecological  
122 Research (GCE-LTER) site 6 at Sapelo Island (Lat: 31.389° N, Long: 81.277° W), and the  
123 Saltmarsh Ecosystem Research Facility (SERF) adjacent to the Skidaway Institute of  
124 Oceanography on Skidaway Island (Lat: 31.975° N, Long: 81.030° W) (Fig. S1). *S. alterniflora*  
125 shoot height and biomass revealed a pronounced primary productivity gradient with ranges  
126 observed within sampled points from 16.5 cm to 128.4 cm, and 1.4 g m<sup>-2</sup> to 1769.8 g m<sup>-2</sup>,  
127 respectively. *S. alterniflora* plants were operationally classified in three phenotypes based on shoot  
128 height: short (< 50 cm), medium (50 – 80 cm) and tall (> 80 cm). Shoot biomass averaged 149.4  
129 g m<sup>-2</sup>, 307.8 g m<sup>-2</sup>, and 958.7 g m<sup>-2</sup> in the short, medium and tall phenotype zones, respectively.  
130 Although shoot biomass was not closely associated with changes in leaf N concentration and total  
131 inorganic N in interstitial porewater, a strong relationship with leaf  $\delta^{15}\text{N}$  and sediment C:N ratio  
132 was observed (Fig. 1a, 1b, S2, S3, S4). Higher shoot biomass was also associated with zones in  
133 the marsh with elevated sediment redox potential (Eh), which was evidenced not only by direct  
134 redox measurements, but also by higher concentrations of interstitial Fe<sup>3+</sup>, and NO<sub>3</sub><sup>-</sup> in the zones  
135 dominated by the tall *S. alterniflora* phenotype (Fig. 1c, Fig. S3). Conversely, in zones dominated  
136 by the short and medium phenotypes, concentrations of porewater  $\Sigma\text{S}^{2-}$  were elevated, reaching  
137 up to 1.5 mM (Fig. S3). Shoot biomass also showed a negative relationship with leaf temperature,  
138 a proxy for leaf stomatal conductance (Ramírez et al., 2016; Fig. 1d).

139 Rates of extracellular enzyme activity for enzymes that catalyze the catabolism of organic C, N  
140 and P compounds, showed a strong relationship to *S. alterniflora* primary production. Rates of  
141 extracellular  $\beta$ -glucosidase (C), chitinase (C, and N) and phosphatase (P) activity in homogenized  
142 sediment slurries were consistently higher in zones with greater *S. alterniflora* shoot biomass at  
143 both Sapelo and Skidaway Island (Fig. 2).

144

## 145 2.2 Microbiome diversity

146 Prokaryotic diversity and abundance were investigated across the *S. alterniflora* biomass gradient  
147 in three compartments: bulk sediment, rhizosphere, and root. The root compartment was recovered  
148 by sonication in an epiphyte removal buffer; thus, likely containing mostly endosphere with  
149 residual rhizoplane microbial communities (Simmons et al., 2018). A total of 32,740 unique  
150 amplicon sequence variants (ASVs) were inferred using DADA2 v.1.10 (Callahan et al., 2016).  
151 After quality filtering, 10,068,980 high quality SSU rRNA sequence reads with a median depth of  
152 49,619 reads per sample were used for microbiome analysis (further details in Materials and  
153 Methods). Prokaryotic communities associated with the tall *S. alterniflora* bulk and rhizosphere  
154 sediment were more diverse and abundant when compared to those of the short phenotype (Fig.  
155 3a, Fig. 3b). In the root compartment, alpha-diversity and prokaryotic abundance were highest in  
156 the short phenotype (Fig. 3a, Fig. 3b). The root compartment showed a significant decline in alpha  
157 diversity in all plant phenotypes driven by a decrease in both richness and evenness when  
158 compared to their bulk and rhizospheric counterparts (Fig. 3a, Fig. 3c). Mean richness  $\pm$  95%  
159 confidence interval (CI<sub>95%</sub>) across microbiome compartments was  $922 \pm 40$ ,  $981 \pm 33$ , and  $695 \pm$   
160  $40$  observed ASVs for bulk sediment, rhizosphere and root prokaryotic communities, respectively.  
161 Decreased evenness in the root compartment was evidenced by the presence of highly dominant  
162 ASVs (Fig. 3c). Despite the decrease in prokaryotic diversity in the root, abundance remained  
163 high, in the range of  $10^7$  SSU rRNA gene copies  $g^{-1}$  fresh root in both tall and short *S. alterniflora*  
164 phenotypes (Fig. 3b).

165 *S. alterniflora* phenotype and microbiome compartment were the most significant deterministic  
166 forces controlling prokaryotic community assembly in GA salt marshes (Fig. 3de, Table 1).  
167 PERMANOVA analysis using the Bray-Curtis dissimilarity index showed that *S. alterniflora*

168 phenotype explained less species exchange in the root when compared to the other two  
169 compartments (Table 1).

170 Phylogenetic community structure was assessed with the nearest taxon index (NTI) and beta  
171 nearest taxon index ( $\beta$ NTI) for within and between prokaryotic communities, respectively (Stegen  
172 et al., 2012, 2013). An NTI value greater than 2 indicates greater phylogenetic clustering within a  
173 community than expected by chance. All bulk and rhizospheric prokaryotic communities had an  
174 NTI greater than 2; while 91% of the root prokaryotic communities met this threshold. NTI values  
175 decreased in closer proximity to roots (Fig. S5). Average  $\pm$  CI<sub>95%</sub> NTI values per microbiome  
176 compartment were  $7.0 \pm 0.3$ ,  $5.6 \pm 0.2$ , and  $3.8 \pm 0.3$  for prokaryotic communities from bulk  
177 sediment, rhizosphere and root compartments, respectively. In order to assess phylogenetic  
178 turnover between similar environments in the investigated salt marshes,  $\beta$ NTI values between  
179 samples from the same microbiome compartment, *S. alterniflora* phenotype, year and location  
180 were calculated. An  $\beta$ NTI value lower than -2 indicates less phylogenetic turnover between  
181 samples than expected by chance. Pairwise comparison between bulk sediment, rhizosphere, and  
182 root prokaryotic communities revealed that 92.2%, 92.6% and 77.8%  $\beta$ NTI values were below -2,  
183 respectively. Similar to NTI analysis, a trend of lower phylogenetic relatedness was observed  
184 closer to the root (Fig. S5). Average  $\pm$  CI<sub>95%</sub>  $\beta$ NTI was  $-5.2 \pm 0.3$ ,  $-4.6 \pm 0.3$ , and  $-3.1 \pm 0.2$  in bulk  
185 sediment, rhizosphere and root pairwise comparisons, respectively. The microbiome compartment  
186 effect on NTI and  $\beta$ NTI was consistent in all *S. alterniflora* phenotypes.

187

### 188 2.3 *S. alterniflora* Root-associated prokaryotic community composition

189 Overall, at the phylum level, prokaryotic communities were predominated by ASVs from the  
190 *Proteobacteria* (46.7%), *Chloroflexi* (15.2%), *Bacteroidetes* (8.4), *Epsilonbacteraeota* (3.7%),  
191 *Spirochaetes* (3.6%), and *Acidobacteria* (3.5%) phyla (Fig. S6). At higher *S. alterniflora* biomass,  
192 an increase in the relative abundance of *Proteobacteria* ASVs and a decline in the relative  
193 abundance of *Chloroflexi* and *Spirochaetes* ASVs was observed (Fig. S6). At increasing proximity  
194 from the root, the relative abundance of *Proteobacteria*, *Spirochaetes* and *Epsilonbacteraeota*  
195 increased while *Acidobacteria* and *Bacteroidetes* decreased (Fig. S6). Prokaryotic taxa with the  
196 potential to catalyze redox reactions in the S, Fe, and N cycles were investigated in greater detail  
197 due to their known significance in salt marsh ecosystem functioning. Putative function was



198 inferred based on homology at the genus level with described prokaryotic species (Table S1).  
199 Prokaryotes putatively capable of nitrification (a.k.a. nitrifiers) exhibited higher relative  
200 abundance in areas colonized by the tall *S. alterniflora* phenotype, in comparison to areas occupied  
201 by the short and medium phenotypes (Fig. 4a). Dominant nitrifiers in the studied system included  
202 members of the bacterial genera *Candidatus Nitrotoga* and *Nitrospira*, as well as the archaeal  
203 genus *Candidatus Nitrosopumilus* (Fig. 4a). Additionally, a significant enrichment in taxa  
204 potentially involved in the Fe and S cycles were detected in the plant root relative to the bulk  
205 sediment (Fig. 4b,c,d). The putative Fe-oxidizer of the *Zetaproteobacteria*, *Mariprofundus* sp.  
206 showed high relative abundance in the roots of the tall *S. alterniflora* phenotype, while  
207 *Acidihalobacter* of the *Gammaproteobacteria* was the predominant Fe-oxidizer in the roots of the  
208 short phenotype (Fig. 4b). Putative autotrophic endosymbionts capable of S oxidation from the  
209 *Candidatus Thiodiazotropha* genus and *Thiomicrospirales* order preferably colonized the roots of  
210 *S. alterniflora* phenotypes regardless of plant phenotype (Fig. 4c). Sulfur oxidizers from the  
211 *Sulfurovum* genus preferentially colonized the areas dominated by the short *S. alterniflora*  
212 phenotype in all compartments (Fig. 4c). Putative sulfate-reducers of the *Desulfobacterales* order:  
213 *Desulfatitalea*, *Desulfopila*, and *Desulfosarcina* genera were enriched at closer proximities to the  
214 *S. alterniflora* root (Fig. 4d).

215 Based on differential abundance analysis performed in DESeq2, many ASVs were shown to be  
216 significantly enriched in the root compartment. Interestingly, many of the enriched taxa appear to  
217 be capable of N fixation, including putative sulfur oxidizers *Candidatus Thiodiazotropha*,  
218 *Desulfovibrio*, and *Arcobacter*, S/sulfate reducers *Sulfurospirillum*, and *Desulfatitalea*, and  
219 *Novosphingobium*, *Azoarcus*, and *Celerinatantimonas* bacteria (Fig. S7a). Taxa significantly  
220 enriched in the tall *S. alterniflora* phenotype comprised nitrifiers from the *Nitrospira* and  
221 *Candidatus Nitrosopumilus* genus, putative metal (Fe and Mn) reducer *Georgfuchsia*, and a  
222 diverse set of aerobic or facultative anaerobic chemoheterotrophs (Fig. S7b).

223

#### 224 2.4 *S. alterniflora* core microbiome

225 Taxa consistently found in independent host microbiome samples have been suggested to perform  
226 key functions in healthy host-microbiome interactions (Shade and Handelsman, 2011), and the set  
227 of persistent taxa have been defined as the host's core microbiome. For this study, an ASV



228 prevalence threshold was operationally defined by plotting the relative abundance and richness of  
229 the rhizosphere and root core microbiomes at 10% intervals from 0% to 100% ASV prevalence  
230 cutoffs (Fig. S8). A conservative prevalence cutoff of 60% was determined by visually inspecting  
231 a threshold in which richness remained stable at increasing cutoff values (Fig. S8). The *S.*  
232 *alterniflora* core root microbiome was composed of only 38 out of 14,505 ASVs, and 54 out of  
233 19,435 ASVs in the root and rhizosphere, respectively. However, in both cases the core  
234 microbiome comprised approximately 20% relative abundance of the total prokaryotic community  
235 (Fig. S8). Both the root and the rhizosphere core microbiomes were dominated by taxa with  
236 inferred metabolic potential for S redox reactions (Fig. 5). The *S. alterniflora* root core microbiome  
237 was comprised of putative autotrophic S oxidizers of the *Sulfurovum* and *Candidatus*  
238 *Thiodiazotropha* genera (Fig. 5), while sulfate reducers were represented by ASVs from the  
239 *Desulfatiglans*, *Desulfocarbo*, *Desulfatitalea*, *Desulfobulbus*, *Desulfopila*, *Desulfosarcina*, SEEP-  
240 SRB1 and Sva0081 genera (Fig. 5). Core root taxa with diazotrophic potential included ASVs  
241 from the *Candidatus* *Thiodiazotropha*, *Desulfatitalea*, *Desulfobulbus* and *Spirochaeta* genera (Fig.  
242 5). In the rhizosphere, the proportion of ASVs with unknown classification at the genus level  
243 according to the SILVA database (release 132), comprised up to ~60% relative abundance of the  
244 core microbiome. Core rhizosphere ASVs with the putative capacity for S oxidation included  
245 members of the *Sulfurovum* and *Thioalkalispira* genera (Fig. 5). Similar to the root core  
246 microbiome, nearly half of the identified taxa at the genus level in the core rhizosphere presented  
247 sulfate reduction capability, such as ASVs from the *Desulfatiglans*, *Desulfocarbo*, *Desulfatitalea*,  
248 *Desulfosarcina*, SEEP-SRB1, and Sva0081 genera (Fig. 5). Putative nitrifiers from the *Candidatus*  
249 *Nitrosopumilus* genus were members of the rhizosphere core microbiome (Fig. 5). Finally, taxa  
250 with N fixation capability in the rhizosphere core microbiome included putative sulfur oxidizers  
251 from the *Thioalkalispira* genus, sulfate reducers from the *Desulfatitalea* genus, and bacterium  
252 from the *Spirochaeta* genus (Fig. 5).

253

### 254 **3. Discussion**

#### 255 3.1. Biogeochemical processes linked to *S. alterniflora* primary productivity at the local scale

256 *S. alterniflora* primary productivity is strongly linked to N uptake kinetics in field and lab studies  
257 (Mendelssohn et al., 1979; Howes et al., 1986, Mendelssohn and Morris, 2000). At the local scale,

258 reduced, anoxic, and sulfidic root conditions were shown to lead to a decline in root energy status,  
259 affecting ammonium uptake kinetics (Koch et al., 1990; Mendelssohn and Morris, 2000). In  
260 parallel, elevated salinity has been associated with a decrease in stomatal conductance and  
261 photosynthetic activity, along with an increase in dark respiration (Giurgevich and Dunn, 1979;  
262 Hwang and Morris, 1994). Our observations corroborate these past results showing that *S.*  
263 *alterniflora* primary productivity is hampered at reduced sediment Eh and under highly sulfidic  
264 conditions, when the plants experience limited leaf gas exchange. Results from this study also  
265 support our previous research which revealed the dynamic interplay between the  
266 growth/physiology of macrophyte plants and macrofaunal bioturbation (Kostka et al., 2002a;  
267 Gribsholt et al., 2003), with crab burrow density shown to directly correlate with aboveground  
268 plant biomass and sediment redox potential (Fig S2).

269 Significant differences in stable N isotope composition of sediment and *S. alterniflora* leaves  
270 provide evidence that N sources and dynamics are distinct along the studied *S. alterniflora* primary  
271 productivity gradient (Craine et al., 2015). We argue that elevated leaf and sediment  $\delta^{15}\text{N}$  in the  
272 tall *S. alterniflora* phenotype is the result of (i) greater nitrogen loss by coupled nitrification-  
273 denitrification, and (ii) differences in the source of N input. Denitrification in Georgia salt marshes  
274 is limited and tightly coupled to prokaryotic nitrification, which discriminates against  $^{15}\text{N}$   
275 (Dollhopf et al., 2005, Craine et al., 2015). Prokaryotes capable of nitrification show higher  
276 relative abundance in sediments dominated by the tall *S. alterniflora* phenotype (Fig. 4a), and their  
277 activity is known to be inhibited by sulfide toxicity (Joye and Hollibaugh, 1995; Dollhopf et al.,  
278 2005). Porewater sulfide concentration in the short and medium *S. alterniflora* phenotype was an  
279 order of magnitude higher than in the tall phenotype. A second explanation for  $\delta^{15}\text{N}$  enrichment in  
280 the tall *S. alterniflora* phenotype is the greater source of planktonic N at closer proximities to the  
281 tidal creek. Planktonic tissue has a  $\delta^{15}\text{N}$  signature of  $8.6 \pm 1.0$  ‰ (Peterson, 1999), which is more  
282 similar to the leaf  $\delta^{15}\text{N}$  measured in the tall *S. alterniflora* ( $7.6 \pm 0.3$  ‰) when compared to the  
283 short phenotype ( $5.5 \pm 0.4$  ‰) (Fig. S4). A larger discrepancy in  $\delta^{13}\text{C}$  between sediment and leaf  
284 tissue in the tall *S. alterniflora* phenotype, as well as a lower sediment C:N ratio, support our  
285 interpretation of a reduced relative contribution of vascular plant material to organic matter  
286 diagenesis (Fig. S4; Ember et al., 1987; Fig. 1b, Gebrehiwet et al., 2008). The average  $\pm$  CI<sub>95%</sub>  
287  $\delta^{13}\text{C}$  signature in sediments from the tall *S. alterniflora* phenotype ( $-20.3 \pm 0.4$  ‰) more closely  
288 resembles that of reported phytoplankton, which enters the marsh via tidal creeks (-17 to -24‰,

289 Fogel et al., 1989;  $-21.3 \pm 1.1$  ‰, Peterson, 1999;  $-20.16$  ‰, Dai et al., 2005). The C:N ratio is  
290 considered as a proxy for soil organic matter reactivity, and a lower C:N ratio indicates a greater  
291 potential for rapid biodegradation and N mineralization (Janssen, 1996). In agreement with this  
292 interpretation, sediments with low C:N ratios from the tall *S. alterniflora* zone contained higher  
293 prokaryotic biomass, and higher rates of extracellular enzyme activities involved in the C, N, and  
294 P cycles. We propose that plant primary productivity is enhanced in the tall *S. alterniflora* zone in  
295 part due to more rapid microbial mineralization of higher-quality sediment organic matter of  
296 planktonic origin, with released inorganic nutrients then made available for plant uptake.

297

### 298 3.2. Assembly of the *S. alterniflora* root microbiome:

299 Previous studies have reported contradictory results with regard to the relationship between the  
300 diversity of the *S. alterniflora* microbiome, plant productivity, and proximity to the root (Zogg et  
301 al., 2018; Lin et al., 2019; Kolton et al., 2020). Our finding of higher prokaryotic alpha diversity  
302 in bulk and rhizospheric sediment associated with the tall *S. alterniflora* phenotype is consistent  
303 with previous findings from Skidaway Island, GA (Kolton et al. 2020). However, Zogg et al.  
304 (2018) and Lin et al., (2019) did not observe significant differences in prokaryotic alpha diversity  
305 between the tall and short *S. alterniflora* phenotypes in bulk and rhizospheric sediments from New  
306 England and Guangdong province in China, respectively. Contrasting results could be due to  
307 limitations in methodology and experimental design in previous work. Sequencing platforms  
308 continue to evolve, enabling higher sequence coverage at lower cost, and our sampling effort was  
309 approximately an order of magnitude more intensive than previous studies characterizing the *S.*  
310 *alterniflora* root microbiome, including our own past work (Zogg et al., 2018; Lin et al., 2019;  
311 Kolton et al., 2020). Moreover, recently developed *in silico* technology to infer ASVs instead of  
312 clustering sequences into operational taxonomic units (OTUs) could also impact the estimation of  
313 alpha diversity metrics.

314 Few studies have investigated microbial diversity in the roots of wetland plant roots. Nonetheless,  
315 consistent with our results, a single report from *S. alterniflora* and studies from other  
316 wetland/estuarine plants show a decline in diversity in the root compared to the bulk and  
317 rhizosphere compartments (Edwards et al., 2015; Hong et al., 2015; Martin et al., 2020a).  
318 Prokaryotic abundance in the endosphere has been previously estimated in the  $10^4$  to  $10^8$  cells  $g^{-1}$

319 range across an array of plant species (Bulgarelli et al., 2013). Taking into consideration that many  
320 of these previous estimates employed cultivation-based methods, and prokaryotic genomes often  
321 contain multiple SSU rRNA operons, our observation of prokaryotic abundance ( $10^7$  SSU rRNA  
322 gene copies  $g^{-1}$ ) would be placed at the high-end of that range. A marked decrease in prokaryotic  
323 alpha diversity with high abundances is an indication that the *S. alterniflora* root compartment is  
324 enriched in dominant and highly active species taking advantage of labile carbon sources, reduced  
325 inorganic compounds, and the oxidized environment found in the *S. alterniflora* root (Carlson and  
326 Forrest, 1982; Maricle and Lee, 2002). Increased relative abundances of S and Fe  
327 chemolithotrophs, and aerobic and facultative anaerobic chemoorganotrophs at closer proximities  
328 to the root further support this interpretation.

329 Microbial community assembly in the root endosphere has been proposed as a two-step  
330 colonization process (Bulgarelli et al., 2013). The first step is driven by microbial proliferation in  
331 the rhizosphere by species capable of utilizing plant-released substrates; while the second is a fine-  
332 tuning step in the rhizoplane, where selection by the plant's genotype-dependent immune system  
333 takes place (Bulgarelli et al., 2013). Endospheric microbial species have co-evolved to evade the  
334 plant immune system by secreting effector proteins that mimic plant proteins (Trivedi et al., 2020).  
335 In *S. alterniflora*, a decrease in prokaryotic richness in the root compartment, and the fact that  
336 plant phenotype was the most important deterministic factor assembling the root prokaryotic  
337 community, suggest that plant selection is an important process in community assembly. However,  
338 community assembly is a result of co-occurring deterministic and stochastic processes (Stegen et  
339 al., 2013; Dini-Andreote et al., 2015). Generally, environmental filtering has been shown to be the  
340 main deterministic process assembling microbial communities spatially, as evidenced by  
341 phylogenetic clustering (Stegen et al., 2012; Freedman and Zak, 2015). Nevertheless, in our study,  
342 environmental filtering was relaxed at closer proximity to the root, a microenvironment  
343 characterized by an abundance of high-quality  $e^-$  donors and acceptors. Most likely, increased  
344 competition, the dominance of fast-growing bacteria filling a resource-rich niche, and historical  
345 contingency (i.e., first prokaryotic species to colonize the root successfully outcompete other taxa)  
346 are co-occurring ecological processes reducing the relative importance of environmental filtering  
347 in the root zone (Fukami, 2015; Hassani et al., 2018; Toju et al., 2018). Increased species  
348 dominance, decreased richness, and increased phylogenetic dispersion with high prokaryotic  
349 abundances in the *S. alterniflora* root supports this hypothesis.

350

351 3.3. Characterization of the *S. alterniflora* core microbiome and potential plant-microbe  
352 interactions driving primary productivity

353 Our results indicate that putative sulfate-reducing and sulfur-oxidizing prokaryotes comprise a  
354 large proportion of the *S. alterniflora* root and rhizosphere core microbiomes. Sulfate-reducing  
355 communities are comprised of metabolically versatile populations capable of utilizing a broad  
356 range of C substrates, including plant-derived substrates (Bahr et al., 2005). The most dominant  
357 sulfate-reducer genus in the *S. alterniflora* core root and rhizosphere, *Desulfatitalea*, mainly  
358 utilizes short-chain fatty acids as an electron donor and C source (Higashioka et al., 2013).  
359 However, other sulfate-reducing members of the root core microbiome such as *Desulfatiglans* and  
360 *Desulfocarbo*, have been shown to oxidize plant-derived aromatic compounds (e.g., lignin) (An  
361 and Picardal, 2014; Suzuki et al., 2014). In salt marsh ecosystems, biogeochemical data indicates  
362 that the C and S cycles are tightly coupled, with *S. alterniflora* photosynthetic activity fueling the  
363 activity and C utilization of sulfate-reducers in the rhizosphere (Kostka et al., 2002b; Hyun et al.,  
364 2007; Spivak and Reeve, 2015). Similarly, sulfide-oxidizers thrive in the *S. alterniflora* root zone,  
365 especially in the short phenotype, where sulfide concentration is elevated (Thomas et al., 2014;  
366 Kolton et al., 2020; this study). In our study, ASVs from the *Sulfurovum* genus were enriched in  
367 all compartments of the short *S. alterniflora* phenotype. This genus has been described as highly  
368 versatile and diverse, allowing for efficient niche partitioning in highly dynamic sulfidic and oxic  
369 environments (Meier et al., 2017; Moulana et al., 2020). The co-occurrence of prokaryotic ASVs  
370 associated with S anaerobic and aerobic metabolisms in the *S. alterniflora* rhizosphere and root,  
371 and highly dynamic O<sub>2</sub> concentrations at the microscale (Koop-Jakobsen et al., 2018), support the  
372 interpretation of a rapid and cryptic S cycle at close proximity to, or even inside, the root tissue.  
373 Rapid and coupled cycling of C and S are crucial to the replenishment of nutrients and electron  
374 acceptors in the *S. alterniflora* root-zone to support high microbial and plant activity. Rapid  
375 organic matter mineralization is especially relevant to effectively recycle N, most often the limiting  
376 nutrient for plant productivity in the salt marsh (subsection 3.1).

377 Previous studies in marshes of the southeastern US show that plant photosynthetic activity and  
378 rhizodeposition stimulate N fixation by root-associated sulfate reducers (Whiting et al., 1986;  
379 Gandy and Yoch, 1988; Lovell et al., 2000). Consistently, prokaryotic species from the

380 *Desulfobulbus*, *Desulfatitalea*, *Desulfovibrio*, and *Sulfurospirillum* genera, either significantly  
381 enriched or members of the *S. alterniflora* root core microbiome, have been shown to couple  
382 sulfate or sulfur respiration to N fixation (Higashioka et al., 2015; Thajudeen et al., 2017). Species  
383 from the root and rhizosphere core microbiome genera *Candidatus* Thiodiazotropha and  
384 *Thioalkalispira* have the metabolic potential to couple S oxidation with C and N fixation (Barbieri  
385 et al., 2010; Petersen et al., 2016). Intriguingly, *Candidatus* Thiodiazotropha is a recently described  
386 genus of endosymbionts discovered in the gills of lucinid bivalves (Petersen et al., 2016). Lucinid  
387 bivalves are not generally found in salt marshes, but they have been associated with reduced plant  
388 sulfide stress in seagrass meadows and mangroves (Lim et al., 2019a; Lim et al., 2019b; Gagnon  
389 et al., 2020). In these ecosystems, a tripartite symbiotic relationship occurs, whereby bivalves  
390 provide O<sub>2</sub> to endosymbiont sulfide-oxidizers that detoxify the plant's environment from sulfide,  
391 a known phytotoxin (Gagnon et al., 2020). Recent studies revealed that *Candidatus*  
392 Thiodiazotropha is also an important and prevalent member of the seagrass root microbiome,  
393 suggesting that these chemolithoautotrophic S oxidizers form a direct association with subtidal  
394 marine plant species without the need of a lucinid bivalve partner (Crump et al., 2018; Martin et  
395 al., 2020b). Our study confirms this finding, and expands the distribution range of *Candidatus*  
396 Thiodiazotropha to the roots of intertidal, estuarine plant species.

397 Although sulfide is generally considered as a potent phytotoxin, slightly sulfidic conditions (< 1  
398 mM) have been shown to actually stimulate *S. alterniflora* growth in a controlled laboratory  
399 experiment (Morris et al., 1996). Energy conservation from sulfide oxidation in the root tissue was  
400 speculated to be the driver of increased plant primary production (Mendelssohn and Morris, 2000).  
401 Further, sulfide oxidation to sulfate has been demonstrated inside *S. alterniflora* root tissues using  
402 isotope tracers (Carlson and Forrest, 1982; Lee et al., 1999). However, it is still not clear what  
403 process, biological or chemical, dominates sulfide oxidation inside *S. alterniflora* roots. We  
404 propose that *S. alterniflora* shares a symbiotic relationship with S oxidizers in both the rhizosphere  
405 and root compartments. Sulfur oxidation may be mediated not only by *Candidatus*  
406 Thiodiazotropha bacteria, but also members of the *Sulfurovum* and *Thioalkalispira* genera, or  
407 endosymbionts from the *Thiomicrospirales* order. Previously studied microbial species from the  
408 *Sulfurovum* genus and endosymbionts from the *Thiomicrospirales* order have been demonstrated  
409 to fix C; whereas members from *Desulfovibrio*, *Thioalkalispira*, and *Candidatus* Thiodiazotropha  
410 genera have been shown to perform both C and N fixation (Barbieri et al., 2010; Petersen et al.,



411 2016; Suzuki et al., 2006; Thajudeen et al., 2017). Moreover, Crump et al. (2018) studying the root  
412 microbiome of seagrass *Zostera* spp., found high transcripts levels of N fixing and sulfur oxidizing  
413 genes from *Gammaproteobacteria* species, including endosymbionts of marine invertebrate from  
414 the *Sedimenticolaceae* family, which includes the *Candidatus* Thiodiazotropha genus. Given that  
415 the *S. alterniflora* root zone is enriched in reduced S and its growth is limited by N uptake, we  
416 suggest that diazotrophy coupled to sulfide oxidation may be a key process that was previously  
417 overlooked. However, direct measurements of N and C fixation, and sulfur oxidation in the roots  
418 of *S. alterniflora*, their rates and controls, along with their relative contribution to plant growth  
419 remain unclear and require further research. Given that most studies, including this study, have  
420 inferred the coupling of S oxidation and N fixation based on gene homology and/or taxonomic  
421 placement, this interpretation should be treated with caution.

#### 422 **4. Conclusions**

423 We studied a gradient in *S. alterniflora* productivity to characterize the ecology and physiology of  
424 the *S. alterniflora* root-associated microbiome, and its potential role shaping plant physiological  
425 performance. In sediments from the tall *S. alterniflora* phenotype, higher prokaryotic biomass and  
426 more rapid microbial mineralization of organic matter was linked to greater inorganic nutrients  
427 replenishment for plant uptake. Prokaryotic communities from bulk and rhizospheric sediment  
428 associated with the tall *S. alterniflora* phenotype contained the highest alpha diversity; while a  
429 decline in diversity was observed in the root in comparison to the to bulk and rhizosphere sediment  
430 compartments in all *S. alterniflora* phenotypes. A marked decrease in prokaryotic alpha diversity  
431 with high abundances and increased phylogenetic dispersion was observed in the *S. alterniflora*  
432 root compartment. Thus, we propose that the *S. alterniflora* root microbiome is dominated by  
433 highly active and competitive species taking advantage of available carbon substrates in the  
434 oxidized root zone. The high relative abundance of prokaryotic ASVs with putative S oxidation  
435 and sulfate reduction capability in the *S. alterniflora* rhizosphere and root suggests a rapid S cycle  
436 at close proximity to, or even inside, the root tissue. Moreover, both functional guilds were  
437 overrepresented in the *S. alterniflora* rhizosphere and root core microbiome. Rapid recycling of S  
438 is crucial for organic matter mineralization in anoxic marsh sediments. Thus, we propose that *S.*  
439 *alterniflora* shares a symbiotic relationship with S oxidizing bacteria in both the rhizosphere and  
440 root compartments. Sulfur oxidizers may benefit *S. alterniflora* plants not only by removing  
441 potentially toxic sulfide from the root zone, but also by coupling S oxidation with N and/or C

442 fixation. The contribution to plant growth of each of these microbial processes represents a  
443 knowledge gap that warrants further research.

## 444 **5. Materials and methods**

### 445 5.1 Sampling design and general site description

446 The study was carried out in two salt marshes for which long-term data is available in the state of  
447 Georgia, USA: (i) the Georgia Coastal Ecosystem - Long Term Ecological Research (GCE-LTER)  
448 site 6 at Sapelo Island (Lat: 31.389° N, Long: 81.277° W), and (ii) the Saltmarsh Ecosystem  
449 Research Facility (SERF) adjacent to the Skidaway Institute of Oceanography on Skidaway Island  
450 (Lat: 31.975° N, Long: 81.030° W) (Fig. S1). The GCE-LTER site was sampled twice, during July  
451 2018 and 2019, while the SERF site was sampled once in July 2019. Four ~100 m transects  
452 adjacent to large tidal creeks with two to four sampling points along *S. alterniflora* primary  
453 productivity gradients were sampled at each site (total: 24 sampling points, Fig. S1).

454 At each sampling point along the transects, a 50 cm x 50 cm quadrat was established to measure  
455 the density of marsh periwinkle snails (*Littoraria irrorata*), and fiddler crab (*Uca pugnax*)  
456 burrows. *In-situ* sediment pH and redox potential (Eh) were measured in triplicate at two sediment  
457 depths (2.5 and 7.5 cm) with a hand-held pH/ORP meter during the two sampling events at Sapelo  
458 Island (HI-98121 tester, Hanna instruments, Woonsocket, RI, USA).

459

### 460 5.2 *S. alterniflora* ecophysiology and elemental analysis

461 *S. alterniflora* shoot density was quantified at every sampling point in 50 cm x 50 cm quadrats,  
462 and shoot height measured for 10 plants per sampling point. *S. alterniflora* plants were  
463 operationally classified in three phenotypes based on shoot height: short (< 50 cm), medium (50 –  
464 80 cm) and tall (> 80 cm). *S. alterniflora* shoot biomass was estimated by allometry, with an  
465 equation calibrated at Sapelo Island (Table S2, Wieski and Pennings, 2014). During the 2019  
466 sampling events, leaf C and N concentration and <sup>13</sup>C and <sup>15</sup>N isotopic natural abundance were  
467 determined for 3 plants per sampling point with elemental and isotope analyses conducted at the  
468 University of Georgia – Center for Applied Isotope Studies (CAIS <https://cais.uga.edu/>). Leaf  
469 elemental analysis was performed by the micro-Dumas method, while isotopic natural abundance  
470 was measured by isotope ratio mass spectrometry. <sup>13</sup>C natural abundance was expressed as the per

471 mille (‰) deviation from the Pee Dee Belemnite standard (PDB)  $^{13}\text{C}:^{12}\text{C}$  ratio ( $\delta^{13}\text{C}$ ); while  $^{15}\text{N}$   
472 natural abundance expressed as the ‰ deviation from the  $\text{N}_2$  atmospheric  $^{15}\text{N}:^{14}\text{N}$  ratio ( $\delta^{15}\text{N}$ ).  
473 Leaf temperature, a proxy for stomatal conductance (Ramírez et al., 2016), was measured between  
474 11:00 and 12:00 utilizing a Fluke-62 MAX+ infrared thermometer (Fluke Co. USA, Everett, WA).  
475 All leaf ecophysiological measurements were performed in young, expanded, and sun exposed  
476 leaves.

477

### 478 5.3 Porewater and sediment sampling and chemical analysis

479 Rhizon samplers with 0.15  $\mu\text{m}$  pore size filters (model CSS, Rhizosphere Research Products,  
480 Wageningen, The Netherlands, <https://www.rhizosphere.com/rhizons>), were used to extract  
481 sediment porewater at 2.5 and 7.5 cm depth from every sampling point. For each porewater sample,  
482 a 2 ml subsample was frozen at  $-20^\circ\text{C}$  for salinity, nitrate, ammonium, and phosphate concentration  
483 analysis; a 2 ml subsample was immediately acidified with 20  $\mu\text{L}$  12N HCl for  $\text{Fe}^{2+}$  and  $\text{Fe}^{3+}$   
484 concentration analysis; and a 100  $\mu\text{L}$  subsample was immediately fixed into 1 ml zinc acetate 2%  
485 (w/v) solution for sulfide concentration analysis (Kostka et al., 2002a; Hyun et al., 2007).

486 Porewater concentrations of nitrate, ammonium, phosphate, sulfide,  $\text{Fe}^{3+}$ , and  $\text{Fe}^{2+}$  were quantified  
487 based on spectrophotometric methods as previously described (Watanabe and Olsen 1965, Cline  
488 1969, Stookey 1970; Sims et al. 1995; Garcia-Robledo et al. 2014). Porewater chloride  
489 concentration was determined by HPLC with ultraviolet detection as described by Beckler et al.  
490 (2014). Salinity was calculated based on porewater chloride concentration.

491 Sediment samples were collected at all sampling points from two depth intervals, 0-5 cm and 5-10  
492 cm. An approximately 30 g sediment subsample was oven-dried at  $60^\circ\text{C}$  for 72 hours. The oven-  
493 dried sample was homogenized using a PowerGen high throughput homogenizer (Fisherbrand,  
494 Pittsburgh, PA) and sent to the University of Georgia CAIS (<https://cais.uga.edu/>) for organic C  
495 and N concentration and  $^{13}\text{C}$  and  $^{15}\text{N}$  isotopic natural abundance analyses. Sediment organic C and  
496  $^{13}\text{C}$  isotopic natural abundance was analyzed in acid-fumigated samples (Ramnarine et al., 2011).

497 Samples collected for microbial community analysis were flash-frozen in an ethanol and dry ice  
498 bath, and stored at  $-80^\circ\text{C}$  until nucleic acid extraction. Sediment samples collected for enzymatic  
499 rates were kept at  $4^\circ\text{C}$ , and analyzed within 4 hours after sampling.

500

#### 501 5.4 Extracellular enzyme activity

502 Rates of extracellular enzymatic activity ( $\beta$ -glucosidase, phosphatase, and chitinase) were  
503 measured in 2019 in Sapelo and Skidaway Island. Technical duplicates of 0-10 cm deep sediment  
504 samples were collected for each sampling point. Rates were analyzed in a homogenized sediment  
505 slurry using fluorescent 4-methylumbelliferone (MUF) linked-substrates (Table S3). Slurry  
506 preparation consisted of mixing wet sediment with 50 mM Tris buffer (pH 7) in a 1:2 (w/v) ratio.  
507 The slurry was homogenized with a stomacher homogenizer (model 400; Seward Medical,  
508 London, England) at 200 rpm for 30 s in ~1-mm filter bags. Sediment slurry (800  $\mu$ L) was  
509 incubated in the dark with 200  $\mu$ L of fluorescent-linked substrate (initial substrate concentration:  
510 40  $\mu$ M). Product accumulation was measured at 0, 0.5, 1, 1.5, 3, 4, 6 and 8 hours after start of the  
511 incubation based on fluorescence intensity (excitation: 355 nm, emission: 460 nm) using a  
512 microplate fluorescence reader (SpectraMax M2, Molecular Devices, San Jose, CA). Enzymatic  
513 rates were calculated by fitting a linear regression, and reported in  $\mu\text{mol kg}_{\text{wet sediment}}^{-1} \text{h}^{-1}$ .

514

#### 515 5.5 Plant sampling, compartment fractionation, and molecular biology

516 *S. alterniflora* roots were sampled at two depths (0-5 and 5-10 cm). Sediment loosely attached to  
517 the root was immediately washed two times with creek water in the field. Roots with remaining  
518 rhizospheric sediment were flash frozen in an ethanol-dry ice bath and stored at -80°C until  
519 analysis.

##### 520 5.5.1 Plant compartment separation

521 Separation of the root and rhizosphere compartments was performed by sonication in an epiphyte  
522 removal buffer (0.1% (v/v) Triton X-100 in 50 mM potassium-phosphate buffer) (Simmons et al.  
523 2018). Sonication was performed at 4°C for 10 minutes with pulses of 160W for 30 s interspersed  
524 with 30 s pauses. Sediment detached from the roots was centrifuged and considered to be the  
525 rhizosphere compartment, while the sonicated roots were considered as the root compartment. The  
526 root compartment was washed with PBS buffer (pH 7.4) three consecutive times, and ground with  
527 liquid N before DNA extraction. Simmons et al. (2018) protocol was designed to isolate

528 endospheric DNA; however, since we did confirm the separation by microscopy, it is possible that  
529 our root compartment contained residues of the rhizoplane compartment.

### 530 5.5.2 Removal of extracellular DNA

531 Prior to bulk sediment DNA extraction, extracellular dissolved or sediment-adsorbed DNA was  
532 removed according to Lever et al. (2015). Briefly, 2 g of sediment was incubated with 2 ml  
533 carbonate dissolution solution (0.43 M sodium acetate, 0.43 M acetic acid, 10 mM EDTA, 100  
534 mM sodium metaphosphate, 3% (w/v) NaCl, pH 4.7) for 1 hour while orbital shaking at 300 rpm  
535 and room temperature. Afterwards, 16 ml of a 300mM Tris-HCl and 10mM EDTA solution (3%  
536 NaCl, pH 10.0) was added into the slurry and incubated for 1 additional hour at the same orbital  
537 shaking condition. After centrifugation at 10,000 g for 20 minutes at room temperature, the pellet  
538 was composed by extracellular-DNA free sediment and used for prokaryotic community  
539 characterization.

### 540 5.5.3 DNA extraction and sequencing library preparation

541 DNA extraction for all assessed compartments was performed using the DNeasy PowerSoil kit  
542 (Qiagen, Valencia, CA) according to the manufacturer's protocol. The concentration of extracted  
543 DNA was determined with the Qubit HS assay (Invitrogen, Carlsbad, CA). Amplification of the  
544 SSU rRNA gene V4 region was performed using the primers 515F (5'-  
545 GTGCCAGCMGCCGCGGTAA') and 806R (5'-GGACTACHVGGGTWTCTAAT') (Caporaso  
546 et al., 2011). Reactions were performed in triplicate of 5 ng DNA template in a solution containing  
547 DreamTaq buffer, 0.2 mM dNTPs, 0.5  $\mu$ M of each primer, 0.75  $\mu$ M of each mitochondrial (mPNA)  
548 and plastid (pPNA) peptide nucleic acid (PNA) clamps, and 1.25 U DreamTaq DNA polymerase  
549 as previously described (Kolton et al 2020, further details in Table S4). PNA clamps have been  
550 shown to reduce plant plastid and mitochondrial DNA amplification in PCR reactions (Lundberg  
551 et al., 2013). Triplicate PCR products were pooled together, barcoded with 10-base unique  
552 barcodes (Fluidigm Corporation, San Francisco, CA), and sequenced on an Illumina MiSeq2000  
553 platform using a 500-cycle v2 sequencing kit (250 paired-end reads) at the Research Resources  
554 Center in the University of Illinois at Chicago. The raw SSU rRNA gene amplicon sequences have  
555 been deposited in the BioProject database (<http://ncbi.nlm.nih.gov/bioproject>) under accessions  
556 PRJNA666636.

557

## 558 5.6 Quantification of prokaryotic abundance

559 Prokaryotic abundance was quantified by quantitative polymerase chain reaction (qPCR) of the  
560 SSU rRNA gene with general primers in a subset of 24 samples collected in Sapelo Island in 2018  
561 and 2019. The subset comprised superficial (0-5 cm) samples from all three compartments,  
562 collected from the four established transects in Sapelo Island. Only sample from the tall and short  
563 extreme *S. alterniflora* phenotypes were included into the analysis. Samples were analyzed in  
564 triplicate using the StepOnePlus platform (Applied Biosystems, Foster City, CA, United States)  
565 and PowerUp SYBR Green Master Mix (Applied Biosystems, Foster City, CA, United States).  
566 Reactions were performed in a final volume of 20 $\mu$ l using the standard primer set 515F (5'-  
567 GTGCCAGCMGCCGCGGTAA') and 806R (5'-GGACTACHVGGGTWTCTAAT') specific for  
568 the prokaryotic SSU rRNA gene (Caporaso et al., 2011, Table S4). To avoid plant plastid and  
569 mitochondrial DNA amplification from rhizosphere and root samples, peptide nucleic acid PCR  
570 blockers (PNA clamps, 0.75  $\mu$ M) were added to all qPCR reactions (Lundberg et al., 2013).  
571 Standard calibration was performed from a 10-fold serial dilution (10<sup>3</sup> to 10<sup>8</sup> molecules) of  
572 standard pGEM-T Easy plasmids (Promega, Madison, WI, United States) containing target  
573 sequences from *Escherichia coli* K12. Specificity of PCR products was confirmed by melting  
574 curve analyses. Prokaryotic SSU rRNA gene copy numbers were calculated as gene copy number  
575 g<sup>-1</sup> of fresh material.

576

## 577 5.7 Ecological, phylogenetic, statistical and bioinformatic analysis

578 Amplification primers were removed from raw fastq files using Cutadapt v.2.0 (Martin, 2011).  
579 Amplicon sequence variants (ASVs) were inferred from quality filtered reads utilizing DADA2  
580 v.1.10 (Callahan et al., 2016). Paired reads were merged, and reads between 251 and 255 bp length  
581 were conserved. Chimeras were removed using the removeBimeraDenovo function from the  
582 DADA2 package. Taxonomy was assigned utilizing the RDP Naive Bayesian Classifier (Wang et  
583 al., 2007) against the SILVA SSU rRNA reference alignment (Release 132, Quast et al., 2013).  
584 Sequences classified as chloroplast, mitochondrial, eukaryotic, or that did not match any  
585 taxonomic phylum were excluded from the dataset. Reads were filtered to remove ASVs that  
586 appeared in less than 5% of the samples and/or had less than 10 total counts. A total of 32,740  
587 unique ASVs were aligned to the SILVA SSU rRNA reference alignment (Release 132, Quast et



588 al., 2013) in mothur v.1.43 (Schloss et al., 2009), and an approximately maximum-likelihood tree  
589 was constructed using FastTree v.2.1 (Price et al., 2010). Finally, 10,068,980 high quality SSU  
590 rRNA sequence reads with a median depth of 49,619 reads per sample were used for subsequent  
591 analysis.

592 Shannon diversity index was estimated using the phyloseq v.1.26 package (McMurdie and  
593 Holmes, 2013). Non-metric multidimensional scaling (nMDS) ordination utilizing the Bray-Curtis  
594 dissimilarity distance was performed. Multivariate variation of the Bray-Curtis dissimilarity  
595 matrix was partitioned to microbiome compartment (bulk sediment, rhizosphere, and root), *S.*  
596 *alterniflora* phenotype (tall, medium, and short), depth (0-5 cm, and 5-10 cm), location (Sapelo  
597 Island, and Skidaway Island), and year (2018, and 2019) based on a PERMANOVA analysis with  
598 999 permutations performed in vegan v. 2.5 (Oksanen et al. 2013). PERMANOVA analysis was  
599 run for the complete dataset and in subsets per microbiome compartment. Differential abundance  
600 analysis was performed to assess genera that were significantly enriched in specific plant  
601 compartments, and in zones of the marsh associated with different *S. alterniflora* phenotypes,  
602 using DESeq2 v.1.26 (Love et al., 2014).

603 To evaluate phylogenetic community structure within (alpha) and between (beta) communities, we  
604 quantified the nearest taxon index (NTI) and the beta nearest taxon index ( $\beta$ NTI), respectively  
605 (Stegen et al., 2012, 2013). NTI and  $\beta$ NTI indices were calculated as the number of standard  
606 deviations of the observed mean-nearest-taxon-distance (MNTD) and  $\beta$ MNTD from a null  
607 distribution (999 randomizations of all ASVs names across phylogenetic tree tips) using the  
608 picante package v. 1.8 (Kembel et al., 2010). For within community analysis, an NTI greater than  
609 +2 indicates that coexisting taxa are more closely related than expected by chance (phylogenetic  
610 clustering due to environmental filtering); while an NTI less than -2 indicates that coexisting taxa  
611 are more distantly related than expected by chance (phylogenetic overdispersion due to greater  
612 competition between closely related ASVs) (Stegen et al., 2012). For  $\beta$ NTI, we assessed pairwise  
613 comparisons for samples from the same plant compartment, *S. alterniflora* phenotype, and  
614 sampling event in order to evaluate if phylogenetic structure within communities (NTI) replicated  
615 at a greater scale ( $\beta$ NTI between samples occupying the same marsh microenvironment). A  $\beta$ NTI  
616 value <-2 or >+2 indicates less or greater than expected phylogenetic turnover between two  
617 samples than expected by chance, respectively (Stegen et. al., 2012).

618 The *S. alterniflora* core root microbiome was investigated. For this study, an ASV prevalence  
619 threshold was operationally defined by plotting the relative abundance and richness of the  
620 rhizosphere and root core microbiomes at 10% intervals from 0% to 100% ASV prevalence cutoffs  
621 (Fig. S8). A conservative prevalence cutoff of 60% was determined by visually inspecting a  
622 threshold in which richness remained stable at increasing cutoff values (Fig. S8). Finally, putative  
623 nitrifying, S oxidizing, S/sulfate reducing, and Fe oxidizing function was inferred based on  
624 homology of ASVs at the genus level with previously described prokaryotic species (Table S1).

## 625 **DATA AVAILABILITY**

626 Sequence data is available in the BioProject database (<http://ncbi.nlm.nih.gov/bioproject>) under  
627 accessions PRJNA666636. Associated data and metadata, and R script for bioinformatic pipeline  
628 used in this study is available in [https://github.com/kostka-lab/Spartina\\_GA\\_Core\\_Microbiome](https://github.com/kostka-lab/Spartina_GA_Core_Microbiome)

## 629 **COMPETING INTERESTS**

630 The authors declare that they have no competing interests

## 631 **AUTHORS CONTRIBUTIONS**

632 J.L.R., M.K. and J.E.K conceived of the study; J.L.R., M.K., T.S., J.E.K collected samples from  
633 the field; J.L.R., and M.K. performed the experiment, and the data analyses. J.L.R., M.K. and  
634 J.E.K., wrote the manuscript; J.L.R., M.K. T.S., and J.E.K., provided valuable insight and ideas  
635 during numerous sessions of discussion. All authors provided critical comments on the manuscript  
636 and gave final approval for publication.

## 637 **FUNDING**

638 This work was supported in part by an institutional grant (NA18OAR4170084) to the Georgia  
639 Sea Grant College Program from the National Sea Grant Office, National Oceanic and  
640 Atmospheric Administration, U.S. Department of Commerce and by a grant from the National  
641 Science Foundation (DEB 1754756). Any opinions, findings and conclusions or  
642 recommendations expressed in this material are those of the authors and do not necessarily  
643 reflect the views of the National Science  
644 Foundation.

## 645 **ACKNOWLEDGMENTS**

646 Authors would like to acknowledge Christina Stoner and Jack Cenatempo, as well as teachers  
647 from the GCE Schoolyard Program for their field work assistance. This is contribution 1087 of  
648 the University of Georgia Marine Institute.

## 649 REFERENCES

- 650 1. An, T.T., Picardal, F.W., 2014. *Desulfocarbo indianensis* gen. nov., sp. nov., a benzoate-  
651 oxidizing, sulfate-reducing bacterium isolated from water extracted from a coal bed.  
652 International journal of systematic and evolutionary microbiology, 64:2907-2914.
- 653 2. Bahr, M., Crump, B.C., Klepac-Ceraj, V., Teske, A., Sogin, M.L., Hobbie, J.E., 2005.  
654 Molecular characterization of sulfate-reducing bacteria in a New England salt  
655 marsh. Environmental Microbiology, 7:1175-1185.
- 656 3. Barbier, E.B., Hacker, S.D., Kennedy, C., Koch, E.W., Stier, A.C., Silliman, B.R., 2011.  
657 The value of estuarine and coastal ecosystem services. Ecological Monographs, 81:169-  
658 193.
- 659 4. Barbieri, E., Ceccaroli, P., Saltarelli, R., Guidi, C., Potenza, L., Basaglia, M., et al., 2010.  
660 New evidence for nitrogen fixation within the Italian white truffle *Tuber magnatum*.  
661 Fungal biology, 114:936-942.
- 662 5. Beckler, J.S., Nuzzio, D.B., Taillefert, M., 2014. Development of single-step liquid  
663 chromatography methods with ultraviolet detection for the measurement of inorganic  
664 anions in marine waters. Limnology and Oceanography: Methods 12:563-576.
- 665 6. Bradley, P.M., Morris, J.T., 1990. Influence of oxygen and sulfide concentration on  
666 nitrogen uptake kinetics in *Spartina alterniflora*. Ecology, 71:282-287.
- 667 7. Brown, M. M., Friez, M. J., Lovell, C. R., 2003. Expression of nifH genes by diazotrophic  
668 bacteria in the rhizosphere of short form *Spartina alterniflora*. FEMS Microbiology  
669 Ecology, 43:411-417.
- 670 8. Bulgarelli, D., Schlaeppli, K., Spaepen, S., Van Themaat, E.V.L., Schulze-Lefert, P., 2013.  
671 Structure and functions of the bacterial microbiota of plants. Annual review of plant  
672 biology, 64:807-838.
- 673 9. Callahan, B.J., McMurdie, P.J., Rosen, M.J., Han, A.W., Johnson, A.J., Holmes, S.P.,  
674 2016. DADA2: High-resolution sample inference from Illumina amplicon data. Nature  
675 methods 13:581–583.
- 676 10. Caporaso, G., Lauber, C.L., Walters, W.A., Berg-Lyons, D., Lozupone, C.A., Turnbaugh,  
677 P.J., Fierer, N., Knight, R., 2011. Global patterns of 16S rRNA diversity at a depth of  
678 millions of sequences per sample. PNAS 108:4516-4522.
- 679 11. Carlson, P.R., Forrest, J., 1982. Uptake of dissolved sulfide by *Spartina alterniflora*:  
680 Evidence from natural sulfur isotope abundance ratios. Science, 216:633-635.
- 681 12. Cline, J.D., 1969. Spectrophotometric determination of hydrogen sulfide in natural waters.  
682 Limnol. Oceanogr. 14:454–458.

- 683 13. Craine, J.M., Brookshire, E.N.J., Cramer, M.D., Hasselquist, N.J., Koba, K., Marin-  
684 Spiotta, E., Wang, L., 2015. Ecological interpretations of nitrogen isotope ratios of  
685 terrestrial plants and soils. *Plant and Soil*, 396:1-26.
- 686 14. Crump, B.C., Wojahn, J.M., Tomas, F., Mueller, R.S., 2018. Metatranscriptomics and  
687 Amplicon Sequencing Reveal Mutualisms in Seagrass Microbiomes. *Frontiers in*  
688 *Microbiology*, 9:388.
- 689 15. Dai, J., Sun, M.-Y., Culp, R.A., Noakes, J.E., 2005. Changes in chemical and isotopic  
690 signatures of plant materials during degradation: Implication for assessing various organic  
691 inputs in estuarine systems. *Geophysical Research Letters*, 32: L13608.
- 692 16. Davis, D. A., Gamble, M. D., Bagwell, C. E., Bergholz, P. W., Lovell, C. R., 2011.  
693 Responses of salt marsh plant rhizosphere diazotroph assemblages to changes in marsh  
694 elevation, edaphic conditions and plant host species. *Microbial ecology*, 61:386-398.
- 695 17. Dini-Andreote, F., Stegen, J.C., van Elsas, J.D., Salles, J.F., 2015. Disentangling  
696 mechanisms that mediate the balance between stochastic and deterministic processes in  
697 microbial succession. *Proceedings of the National Academy of Sciences*, 112:E1326-  
698 E1332.
- 699 18. Dollhopf, S.L., Hyun, J.H., Smith, A.C., Adams, H.J., O'Brien, S., Kostka, J.E., 2005.  
700 Quantification of ammonia-oxidizing bacteria and factors controlling nitrification in salt  
701 marsh sediments. *Applied and Environmental Microbiology*, 71:240-246.
- 702 19. Dubilier, N., Bergin, C., Lott, C., 2008. Symbiotic diversity in marine animals: the art of  
703 harnessing chemosynthesis. *Nature Reviews Microbiology*, 6:725-740.
- 704 20. Edwards, J., Johnson, C., Santos-Medellín, C., Lurie, E., Podishetty, N.K., Bhatnagar, S.,  
705 Eisen, J.A., Sundaresan, V., 2015. Structure, variation, and assembly of the root-associated  
706 microbiomes of rice. *Proceedings of the National Academy of Sciences*, 112:E911-E920.
- 707 21. Ember, L.M., Williams, D.F., Morris, J.T., 1987. Processes that influence carbon isotope  
708 variations in salt marsh sediments. *Marine Ecology Progress Series*, 36:33-42.
- 709 22. Fogel, M. L., Sprague, E. K., Gize, A. P., Frey, R. W., 1989. Diagenesis of organic matter  
710 in Georgia salt marshes. *Estuarine, Coastal and Shelf Science*, 28:211-230.
- 711 23. Freedman, Z., Zak, D.R., 2015. Soil bacterial communities are shaped by temporal and  
712 environmental filtering: evidence from a long-term chronosequence. *Environmental*  
713 *microbiology*, 17:3208-3218.
- 714 24. Fukami, T., 2015. Historical contingency in community assembly: integrating niches,  
715 species pools, and priority effects. *Annual Review of Ecology, Evolution, and Systematics*,  
716 46:1-23.
- 717 25. Gagnon, K., Rinde, E., Bengil, E.G., Carugati, L., Christianen, M.J., Danovaro, R., Gambi,  
718 C., Govers, L.L., Kipson, S., Meysick, L., Pajusalu, L., 2020. Facilitating foundation  
719 species: The potential for plant–bivalve interactions to improve habitat restoration success.  
720 *Journal of Applied Ecology*. DOI: 10.1111/1365-2664.13605

- 721 26. Gandy, E.L., Yoch, D.C., 1988. relationship between nitrogen-fixing sulfate reducers and  
722 fermenters in salt marsh sediments and roots of *Spartina alterniflora*. Applied and  
723 Environmental Microbiology, 54:2031-2036.
- 724 27. Garcia-Robledo, E., Corzo, A., Papaspyrou, S., 2014. A fast and direct spectrophotometric  
725 method for the sequential determination of nitrate and nitrite at low concentrations in small  
726 volumes. Marine Chemistry, 162:30-36.
- 727 28. Gebrehiwet, T., Koretsky, C.M., Krishnamurthy, R.V., 2008. Influence of *Spartina* and  
728 *Juncus* on saltmarsh sediments. III. Organic geochemistry. Chemical Geology, 255:114-  
729 119.
- 730 29. Giurgevich, J.R., Dunn, E.L., 1979. Seasonal Patterns of CO<sub>2</sub> and Water Vapor Exchange  
731 of the Tall and Short Height Forms of *Spartina alterniflora* Loisel in a Georgia Salt Marsh.  
732 Oecologia, 43:139-156.
- 733 30. Gribsholt, B., Kostka, J. E., & Kristensen, E., 2003. Impact of fiddler crabs and plant roots  
734 on sediment biogeochemistry in a Georgia saltmarsh. Marine Ecology Progress Series,  
735 259:237-251.
- 736 31. Hassani, M.A., Durán, P., Hacquard, S., 2018. Microbial interactions within the plant  
737 holobiont. Microbiome, 6:58.
- 738 32. Higashioka, Y., Kojima, H., Watanabe, M., Fukui, M., 2013. *Desulfatitalea tepidiphila*  
739 gen. nov., sp. nov., a sulfate-reducing bacterium isolated from tidal flat sediment.  
740 International journal of systematic and evolutionary microbiology, 63:761-765.
- 741 33. Higashioka, Y., Kojima, H., Watanabe, T., & Fukui, M., 2015. Draft genome sequence of  
742 *Desulfatitalea tepidiphila* S28bFT. Genome announcements, 3(6), e01326-15.
- 743 34. Hong, Y., Liao, D., Hu, A., Wang, H., Chen, J., Khan, S., Su, J., Li, H., 2015. Diversity of  
744 endophytic and rhizoplane bacterial communities associated with exotic *Spartina*  
745 *alterniflora* and native mangrove using Illumina amplicon sequencing. Canadian journal  
746 of microbiology, 61:723-733.
- 747 35. Hopkinson, C.S., Wolanski, E., Brinson, M.M., Cahoon, D.R., and Perillo, G.M.E., 2019.  
748 Coastal Wetlands: A Synthesis. In: G.M.E., Perillo, E., Wolanski, D.R., Cahoon, and C.S.,  
749 Hopkinson. (Eds.) Coastal Wetlands, Second Edition: An Integrated and Ecosystem  
750 Approach. Elsevier, pp. 1–75.
- 751 36. Howarth, R.W., 1984. The ecological significance of sulfur in the energy dynamics of salt  
752 marsh and coastal marine sediments. Biogeochemistry, 1:5-27.
- 753 37. Howes, B.L., Dacey, J.W.H., Goehringer, D.D., 1986. Factors controlling the growth  
754 form of *Spartina alterniflora*: feedbacks between above-ground production, sediment  
755 oxidation, nitrogen and salinity. Journal of Ecology, 74:881-898.
- 756 38. Hwang, Y-S., Morris, J.T., 1994. Whole-plant gas exchange responses of *Spartina*  
757 *alterniflora* (Poaceae) to a range of constant and transient salinities. American Journal of  
758 Botany, 81:659-665.



- 759 39. Hyun, J.H., Smith, A.C., Kostka, J.E., 2007. Relative contributions of sulfate-and iron (III)  
760 reduction to organic matter mineralization and process controls in contrasting habitats of  
761 the Georgia saltmarsh. *Applied Geochemistry*, 22:2637-2651.
- 762 40. Janssen, B., 1996. Nitrogen mineralization in relation to C:N ratio and decomposability of  
763 organic materials. *Plant Soil*. 181:39–45
- 764 41. Joye, S.B., Hollibaugh, J.T., 1995. influence of sulfide inhibition of nitrification on  
765 nitrogen regeneration in sediments. *Science*, 270:623-625.
- 766 42. Kembel, S., Cowan, P., Helmus, M., Cornwell, W., Morlon, H., Ackerly, D., Blomberg,  
767 S., Webb, C., 2010. Picante: R tools for integrating phylogenies and ecology.  
768 *Bioinformatics*, 26:1463–1464.
- 769 43. Kirwan, M.L., Guntenspergen, G.R., Morris, J.T., 2009. Latitudinal trends in *Spartina*  
770 *alterniflora* productivity and the response of coastal marshes to global change. *Global*  
771 *Change Biology*, 15:1982-1989.
- 772 44. Koch, M.S., Mendelsohn, I.A., McKee, K.L., 1990. Mechanism for the hydrogen  
773 sulfide-induced growth limitation in wetland macrophytes. *Limnology and*  
774 *Oceanography*, 35:399-408.
- 775 45. Kolton, M., Rolando, J.L., Kostka, J.E., 2020. Elucidation of the rhizosphere microbiome  
776 linked to *Spartina alterniflora* phenotype in a salt marsh on Skidaway Island, Georgia,  
777 USA. *FEMS Microbiology Ecology*, 96:fiaa026.
- 778 46. Koop-Jakobsen, K., Mueller, P., Meier, R.J., Liebsch, G., Jensen, K., 2018. Plant-sediment  
779 interactions in salt marshes—an optode imaging study of O<sub>2</sub>, pH, and CO<sub>2</sub> gradients in the  
780 rhizosphere. *Frontiers in plant science*, 9:541.
- 781 47. Koretsky, C.M., Moore, C.M., Lowe, K.L., Meile, C., DiChristina, T.J., Van Cappellen, P.,  
782 2003. Seasonal oscillation of microbial iron and sulfate reduction in saltmarsh sediments  
783 (Sapelo Island, GA, USA). *Biogeochemistry*, 64:179-203.
- 784 48. Kostka, J.E., Gribsholt, B., Petrie, E., Dalton, D., Skelton, H., Kristensen, E., 2002a. The  
785 rates and pathways of carbon oxidation in bioturbated saltmarsh sediments. *Limnology and*  
786 *Oceanography*, 47:230-240.
- 787 49. Kostka, J.E., Roychoudhury, A., Van Cappellen, P., 2002b. Rates and controls of anaerobic  
788 microbial respiration across spatial and temporal gradients in saltmarsh sediments.  
789 *Biogeochemistry*, 60:49-76.
- 790 50. Lee, R.W., Kraus, D.W., Doeller, J.E., 1999. Oxidation of sulfide by *Spartina alterniflora*  
791 roots. *Limnology and Oceanography*, 44:1155-1159.
- 792 51. Lever, M.A., Torti, A., Eickenbusch, P., Michaud, A.B., Šantl-Temkiv, T., Jørgensen,  
793 B.B., 2015. A modular method for the extraction of DNA and RNA, and the separation of  
794 DNA pools from diverse environmental sample types. *Frontiers in Microbiology*, 6:476.
- 795 52. Lim, S.J., Davis, B.G., Gill, D.E., Walton, J., Nachman, E., Engel, A.S., Anderson, L.C.  
796 and Campbell, B.J., 2019a. Taxonomic and functional heterogeneity of the gill microbiome  
797 in a symbiotic coastal mangrove lucinid species. *The ISME journal*, 13:902-920.



- 798 53. Lim, S.J., Alexander, L., Engel, A.S., Paterson, A.T., Anderson, L.C., Campbell, B.J.,  
799 2019b. Extensive thioautotrophic gill endosymbiont diversity within a single *Ctena*  
800 *orbiculate* (Bivalvia: Lucinidae) population and implications for defining host-symbiont  
801 specificity and species recognition. *mSystems*, 4:e00280-19.
- 802 54. Lin, L., Liu, W., Zhang, M., Lin, X., Zhang, Y., Tian, Y., 2019. Different height forms of  
803 *Spartina alterniflora* might select their own rhizospheric bacterial communities in southern  
804 coast of China. *Microbial Ecology*, 77:124-135.
- 805 55. Liu, Y., Zhu, A., Tan, H., Cao, L., Zhang, R., 2019. Engineering banana endosphere  
806 microbiome to improve Fusarium wilt resistance in banana. *Microbiome*, 7:74.
- 807 56. Love, M.I., Huber, W., Anders, S., 2014. Moderated estimation of fold change and  
808 dispersion for RNA-seq data with DESeq2. *Genome Biology*, 15:550.
- 809 57. Lovell, C.R., Piceno, Y.M., Quattro, J.M., Bagwell, C.E., 2000. Molecular analysis of  
810 diazotroph diversity in the rhizosphere of the smooth cordgrass, *Spartina alterniflora*.  
811 *Applied and Environmental Microbiology*, 66:3814-3822.
- 812 58. Lundberg, D.S., Yourstone, S., Mieczkowski, P., Jones, C.D., Dangl, J.L., 2013. Practical  
813 innovations for high-throughput amplicon sequencing. *Nature Methods*, 10:999–1002.
- 814 59. Maricle, B.R., Lee, R.W., 2002. Aerenchyma development and oxygen transport in the  
815 estuarine cordgrasses *Spartina alterniflora* and *S. anglica*. *Aquatic Botany*, 74:109–120.
- 816 60. Martin, M., 2011. Cutadapt removes adapter sequences from high-throughput sequencing  
817 reads. *EMBnet.Journal*, 17:10-12.
- 818 61. Martin, B.C., Alarcon, M.S., Gleeson, D., Middleton, J.A., Fraser, M.W., Ryan, M.H.,  
819 Holmer, M., Kendrick, G.A., Kilminster, K., 2020a. Root microbiomes as indicators of  
820 seagrass health. *FEMS Microbiology Ecology*, 96:fiz201.
- 821 62. Martin, B.C., Middleton, J.A., Fraser, M.W., Marshall, I.P., Scholz, V.V. and Schmidt, H.,  
822 2020b. Cutting out the middle clam: lucinid endosymbiotic bacteria are also associated  
823 with seagrass roots worldwide. *The ISME journal*, 14:2901-2905.
- 824 63. McMurdie, P.J., Holmes, S., 2013. phyloseq: an R package for reproducible interactive  
825 analysis and graphics of microbiome census data. *PloS one*, 8(4).
- 826 64. Mcowen, C.J., Weatherdon, L.V., Van Bochove, J.W., Sullivan, E., Blyth, S., Zockler, C.,  
827 Stanwell-Smith, D., Kingston, N., Martin, C.S., Spalding, M., Fletcher, S., 2017. A global  
828 map of saltmarshes. *Biodiversity data journal*, 5: e11764.
- 829 65. Meier, D. V., Pjevac, P., Bach, W., Hourdez, S., Girguis, P. R., Vidoudez, C., et al., 2017.  
830 Niche partitioning of diverse sulfur-oxidizing bacteria at hydrothermal vents. *The ISME*  
831 *Journal*, 11:1545-1558.
- 832 66. Mendelssohn, I.A., 1979. the influence of nitrogen level, form, and application method on  
833 the growth response of *Spartina alterniflora* in North Carolina. *Estuaries*, 2:106-112.

- 834 67. Mendelssohn, I.A., McKee, K.L., 1992. Indicators of environmental stress in wetland  
835 plants. In *Ecological indicators* (pp. 603-624). Springer, Boston, MA.
- 836 68. Mendelssohn, I.A., Morris, J.T., 2000. Eco-physiological controls on the productivity of  
837 *Spartina alterniflora* Loisel. In: Weinstein, M.P., Kreeger, D.A. (Eds.). *Concepts and*  
838 *controversies in tidal marsh ecology*. Kluwer Academic Publishers, pp. 59–80.
- 839 69. Mitsch, W. J., Gosselink, J. G., 1993. *Wetlands*. Van Nostrand Reinhold, New York, New  
840 York, USA.
- 841 70. Morris, J.T., Dacey, J.W.H., 1984. Effects of O<sub>2</sub> on ammonium uptake and root respiration  
842 by *Spartina alterniflora*. *American Journal of Botany*, 71:979-985.
- 843 71. Morris, J.T., Haley, C., Krest, R., 1996. Effects of sulfide concentrations on growth and  
844 dimethylsulphonioacetate (DMSA) concentration in *Spartina alterniflora*. In: Kiene,  
845 R., Visscher, R., Keller, M., Kirst, G. (Eds.) *Biological and environmental chemistry of*  
846 *DMSA and related sulfonium compounds*. Plenum, pp. 87-95
- 847 72. Moulana, A., Anderson, R. E., Fortunato, C. S., Huber, J. A., 2020. Selection is a significant  
848 driver of gene gain and loss in the pangenome of the bacterial genus *Sulfurovum* in  
849 geographically distinct deep-sea hydrothermal vents. *Msystems*, 5:e00673-19.
- 850 73. Murphy, A.E., Bulseco, A.N., Ackerman, R., Vineis, J.H. and Bowen, J.L., 2020. Sulphide  
851 addition favours respiratory ammonification (DNRA) over complete denitrification and  
852 alters the active microbial community in salt marsh sediments. *Environmental*  
853 *Microbiology*, 22:2124-2139.
- 854 74. Oksanen, J., Blanchet, F.G., Kindt, R., Legendre, P., Minchin, P.R., O'hara, R.B., Simpson,  
855 G.L., Solymos, P., Stevens, M.H.H., Wagner, H., Oksanen, M.J., 2013. Package 'vegan'.  
856 *Community ecology package*, version, 2(9), pp.1-295.
- 857 75. Petersen, J.M., Kemper, A., Gruber-Vodicka, H., Cardini, U., Van Der Geest, M., Kleiner,  
858 M., Bulgheresi, S., Mußmann, M., Herbold, C., Seah, B.K., Antony, C.P., 2017.  
859 Chemosynthetic symbionts of marine invertebrate animals are capable of nitrogen fixation.  
860 *Nature microbiology*, 2:16195.
- 861 76. Peterson, B.J., 1999. Stable isotopes as tracers of organic matter input and transfer in  
862 benthic food webs: A review. *Acta Oecologica*, 20:479-487.
- 863 77. Price, M.N., Dehal, P.S., Arkin, A.P., 2010. FastTree 2 – approximately maximum-  
864 likelihood trees for large alignments. *PLoS ONE*, 5:e9490.
- 865 78. Quast, C., Pruesse, E., Yilmaz, P., Gerken, J., Schweer, T., Yarza, P., Peplies, J., Glöckner,  
866 F.O., 2013. The SILVA ribosomal RNA gene database project: improved data processing  
867 and web-based tools. *Nucleic Acids Research*, 41:D590-D596.
- 868 79. Ramírez, D.A., Yactayo, W., Rens, L.R., Rolando, J.L., Palacios, S., De Mendiburu, F.,  
869 Mares, V., Barreda, C., Loayza, H., Monneveux, P., Zotarelli, L., Khan, A., Quiroz, R.,  
870 2016. Defining biological thresholds associated to plant water status for monitoring water

- 871 restriction effects: Stomatal conductance and photosynthesis recovery as key indicators in  
872 potato. *Agricultural Water Management*, 177:369-378.
- 873 80. Ramnarine, R., Voroney, R.P., Wagner-Riddle, C., Dunfield, K.E., 2011. Carbonate  
874 removal by acid fumigation for measuring the  $\delta^{13}\text{C}$  of soil organic carbon. *Canadian*  
875 *Journal of Soil Science*, 91:247–250.
- 876 81. Simmons, T., Caddell, D.F., Deng, S., Coleman-Derr, D., 2018. Exploring the root  
877 microbiome: extracting bacterial community data from the soil, rhizosphere, and root  
878 endosphere. *Journal of Visualized Experiments*, 135:e57561.
- 879 82. Schloss, P.D., Westcott, S.L., Ryabin, T., Hall, J.R., Hartmann, M., Hollister, E.B.,  
880 Lesniewski, R.A., Oakley, B.B., Parks, D.H., Robinson, C.J., Sahl, J.W., 2009. Introducing  
881 mothur: open-source, platform-independent, community-supported software for describing  
882 and comparing microbial communities. *Applied and Environmental Microbiology*,  
883 75:7537-7541.
- 884 83. Shade, A., Handelsman, J., 2012. Beyond the Venn diagram: the hunt for a core  
885 microbiome. *Environmental microbiology*, 14:4-12.
- 886 84. Sims, G.K., Ellsworth, T.R., Mulvaney, R.L., 1995. Microscale determination of inorganic  
887 nitrogen in water and soil extracts. *Communications in Soil Science and Plant Analysis*,  
888 26:303–316.
- 889 85. Spivak, A.C., Reeve, J., 2015. Rapid cycling of recently fixed carbon in a *Spartina*  
890 *alterniflora* system: a stable isotope tracer experiment. *Biogeochemistry* 125:97-114.
- 891 86. Stegen, J.C., Lin, X., Konopka, A.E., Fredrickson, J.K., 2012. Stochastic and deterministic  
892 assembly processes in subsurface microbial communities. *The ISME journal*, 6:1653-1664.
- 893 87. Stegen, J.C., Lin, X., Fredrickson, J.K., Chen, X., Kennedy, D.W., Murray, C.J., Rockhold,  
894 M.L., Konopka, A., 2013. Quantifying community assembly processes and identifying  
895 features that impose them. *The ISME journal*, 7:2069-2079.
- 896 88. Stookey, L.L., 1970. Ferrozine - a new spectrophotometric reagent for iron. *Anal. Chem.*  
897 43:779-781.
- 898 89. Suzuki, Y., Kojima, S., Sasaki, T., Suzuki, M., Utsumi, T., Watanabe, H., et al., 2006.  
899 Host-symbiont relationships in hydrothermal vent gastropods of the genus *Alviniconcha*  
900 from the Southwest Pacific. *Applied and Environmental Microbiology*, 72:1388-1393.
- 901 90. Suzuki, D., Li, Z., Cui, X., Zhang, C., Katayama, A., 2014. Reclassification of  
902 *Desulfobacterium anilini* as *Desulfatiglans anilini* comb. nov. within *Desulfatiglans* gen.  
903 nov., and description of a 4-chlorophenol-degrading sulfate-reducing bacterium,  
904 *Desulfatiglans parachlorophenolica* sp. nov. *International journal of systematic and*  
905 *evolutionary microbiology*, 64:3081-3086.
- 906 91. Thajudeen, J., Yousuf, J., Veetil, V. P., Varghese, S., Singh, A., Abdulla, M. H., 2017.  
907 Nitrogen fixing bacterial diversity in a tropical estuarine sediments. *World Journal of*  
908 *Microbiology and Biotechnology*, 33:41.

- 909 92. Thomas, F., Giblin, A.E., Cardon, Z.G., Sievert, S.M., 2014. Rhizosphere heterogeneity  
910 shapes abundance and activity of sulfur-oxidizing bacteria in vegetated salt marsh  
911 sediments. *Frontiers in microbiology*, 5:309.
- 912 93. Tobias C.R., Neubauer S.C., 2019. Salt marsh biogeochemistry—an overview. In:  
913 Perillo, G.M.E., Wolanski, E., Cahoon D.R., Brinson, M.M., (Eds.). *Coastal wetlands: an*  
914 *integrated ecological approach*. Elsevier, pp. 445–492.
- 915 94. Toju, H., Peay, K.G., Yamamichi, M., Narisawa, K., Hiruma, K., Naito, K., Fukuda, S.,  
916 Ushio, M., Nakaoka, S., Onoda, Y., Yoshida, K., 2018. Core microbiomes for sustainable  
917 agroecosystems. *Nature Plants*, 4:247-257.
- 918 95. Trivedi, P., Leach, J. E., Tringe, S. G., Sa, T., Singh, B. K., 2020. Plant–microbiome  
919 interactions: from community assembly to plant health. *Nature Reviews Microbiology*,  
920 18:607-621.
- 921 96. Valiela, I., Teal, J.M., Deuser, W.G., 1978. The nature of growth forms in the salt marsh  
922 grass *Spartina alterniflora*. *The American Naturalist* 112:461–470
- 923 97. Wang, Q., Garrity, G.M., Tiedje, J.M., Cole, J.R., 2007. Naive Bayesian classifier for rapid  
924 assignment of rRNA sequences into the new bacterial taxonomy. *Applied and*  
925 *environmental microbiology*, 73:5261–5267.
- 926 98. Watanabe, F.S., Olsen, S.R., 1965. Test of an ascorbic acid method for determining  
927 phosphorus in water and NaHCO<sub>3</sub> extracts from soil. *Soil Science Society Proceedings*,  
928 29:677-678.
- 929 99. White, J.F., Kingsley, K.L., Zhang, Q., Verma, R., Obi, N., Dvinskikh, S., Elmore, M.T.,  
930 Verma, S.K., Gond, S.K., Kowalski, K.P., 2019. Endophytic microbes and their potential  
931 applications in crop management. *Pest management science*, 75:2558-2565.
- 932 100. Whiting, G.J., Gandy, E.L., Yoch, D.C., 1986. Tight coupling of root-associated  
933 nitrogen fixation and plant photosynthesis in the salt marsh grass *Spartina alterniflora* and  
934 carbon dioxide enhancement of nitrogenase activity. *Applied and Environmental*  
935 *Microbiology*, 52:108-113.
- 936 101. Wieski, K., Pennings, S., 2014. Climate Drivers of *Spartina alterniflora* saltmarsh  
937 production in Georgia, USA. *Ecosystems*, 17:473-484.
- 938 102. Zhang, L., Zhang, W., Li, Q., Cui, R., Wang, Z., Wang, Y., Zhang, Y.Z., Ding, W.,  
939 Shen, X., 2020. Deciphering the root endosphere microbiome of the desert plant *Alhagi*  
940 *sparsifolia* for drought resistance-promoting bacteria. *Applied and Environmental*  
941 *Microbiology*, 86:e02863-19.
- 942 103. Zheng, Y., Hou, L., Liu, M., Yin, G., Gao, J., Jiang, X., Lin, X., Li, X., Yu, C.,  
943 Wang, R., 2016. Community composition and activity of anaerobic ammonium oxidation  
944 bacteria in the rhizosphere of salt-marsh grass *Spartina alterniflora*. *Applied Microbiology*  
945 *and Biotechnology*, 100:8203-8212.

946 104. Zogg, G.P., Travis, S.E., Brazeau, D.A., 2018. Strong associations between plant  
947 genotypes and bacterial communities in a natural salt marsh. *Ecology and Evolution*  
948 8:4721-4730.

949

950

951

952

953

954

955

956

957

958

959

960

961

962

963

964

965

966

967

968

969

970

971

972

973

974

975

976 **Table 1:** Analysis of the deterministic parameters controlling microbiome assembly.  
 977 PERMANOVA analysis was conducted using the Bray-Curtis metric with 999 permutations.  
 978 Results are provided for the complete data set and for microbiome compartments.

979

| Factor                              | All     |                | Bulk sediment |                | Rhizosphere |                | Root    |                |
|-------------------------------------|---------|----------------|---------------|----------------|-------------|----------------|---------|----------------|
|                                     | F-value | R <sup>2</sup> | F-value       | R <sup>2</sup> | F-value     | R <sup>2</sup> | F-value | R <sup>2</sup> |
| Compartment                         | 16.6    | 12.1**         | -             | -              | -           | -              | -       | -              |
| <i>S. alterniflora</i><br>phenotype | 12.0    | 8.8**          | 8.2           | 17.6**         | 7.1         | 16.1**         | 4.2     | 10.7**         |
| Location                            | 13.9    | 5.1**          | 9.2           | 9.8**          | 8.1         | 9.2**          | 4.7     | 5.9**          |
| Depth                               | 4.6     | 1.7**          | 3.2           | 3.5**          | 2.4         | 2.7**          | 2.7     | 3.4**          |
| Year                                | 2.3     | 0.8**          | 2.6           | 2.8**          | 1.5         | 1.7            | 1.6     | 2.0*           |

980

981

982

983

984

985

986

987

988

989

990

991

992

993

994

995

996

997

998

999



1000 **Figure 1:** Statistical comparisons by linear regression analysis of average plant biomass and leaf  
1001 natural  $^{15}\text{N}$  abundance ( $\delta^{15}\text{N}$ ) (a), sediment C:N ratio (b), sediment redox potential (Eh) (c), and  
1002 leaf temperature (d). Plant biomass was calculated as the average of 10 individuals per sampling  
1003 point. Each leaf  $\delta^{15}\text{N}$ , sediment C:N ratio, redox potential, and leaf temperature value represents  
1004 the average of 3, 1, 3, and 5 replicates, respectively.

1005

1006 **Figure 2:** Statistical comparisons by linear regression analysis of enzyme activity rates and plant  
1007 biomass assessed at Skidaway Island (a), and Sapelo Island (b). For each sample, rates were  
1008 calculated from 8 time point measurements. Plant biomass represents the average of 10 individuals  
1009 per sampling point.

1010

1011 **Figure 3:** Diversity and abundance of the *S. alterniflora* microbiome. Boxplots of the Shannon  
1012 diversity index (a), and prokaryotic abundance determined by qPCR of SSU rRNA genes (b) per  
1013 microbiome compartment and *S. alterniflora* phenotype. Evenness across plant compartments  
1014 assessed by a cumulative rank-abundance plot (c). Non-metric multidimensional scaling (nMDS)  
1015 ordination of the Bray-Curtis dissimilarity matrix across all collected samples with colors  
1016 representing microbiome compartment (d) and *S. alterniflora* phenotype (e). nMDS stress: 0.10.

1017

1018 **Figure 4:** Relative abundance of putative nitrifiers (a), Fe oxidizers (b), S oxidizers (c), and  
1019 S/sulfate reducers (d) by microbiome compartment and *S. alterniflora* phenotype.

1020

1021 **Figure 5:** Prokaryotic identity and relative abundance of the *S. alterniflora* rhizosphere and root  
1022 core microbiome. Phylogenetic characterization was conducted using an approximately-  
1023 maximum-likelihood model of the 72 ASVs comprising the *S. alterniflora* core rhizosphere and  
1024 root microbiome. Taxonomic information at the genus level is provided for all ASVs. When  
1025 taxonomic assignment was unknown at the genus level, the “Unk” prefix was used before the  
1026 highest resolution taxonomic level assigned.

1027

1028

1029

1030

1031

1032

1033

1034

1035 **Figure 1:**

1036

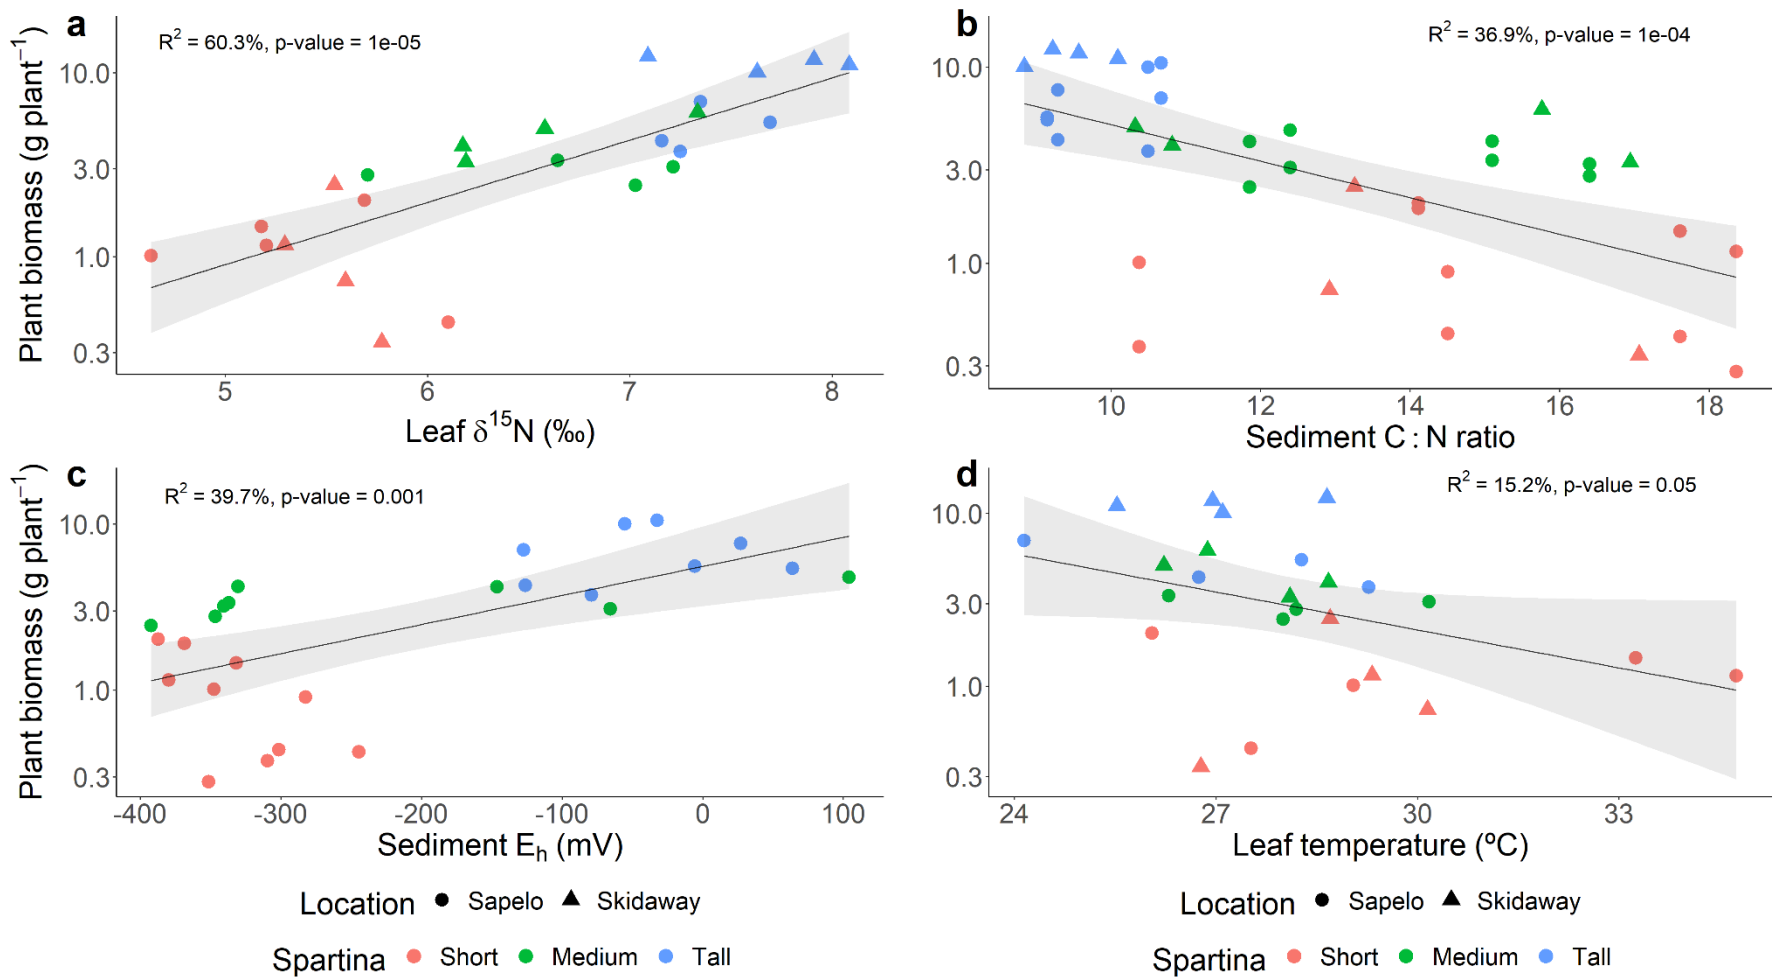

1037

1038

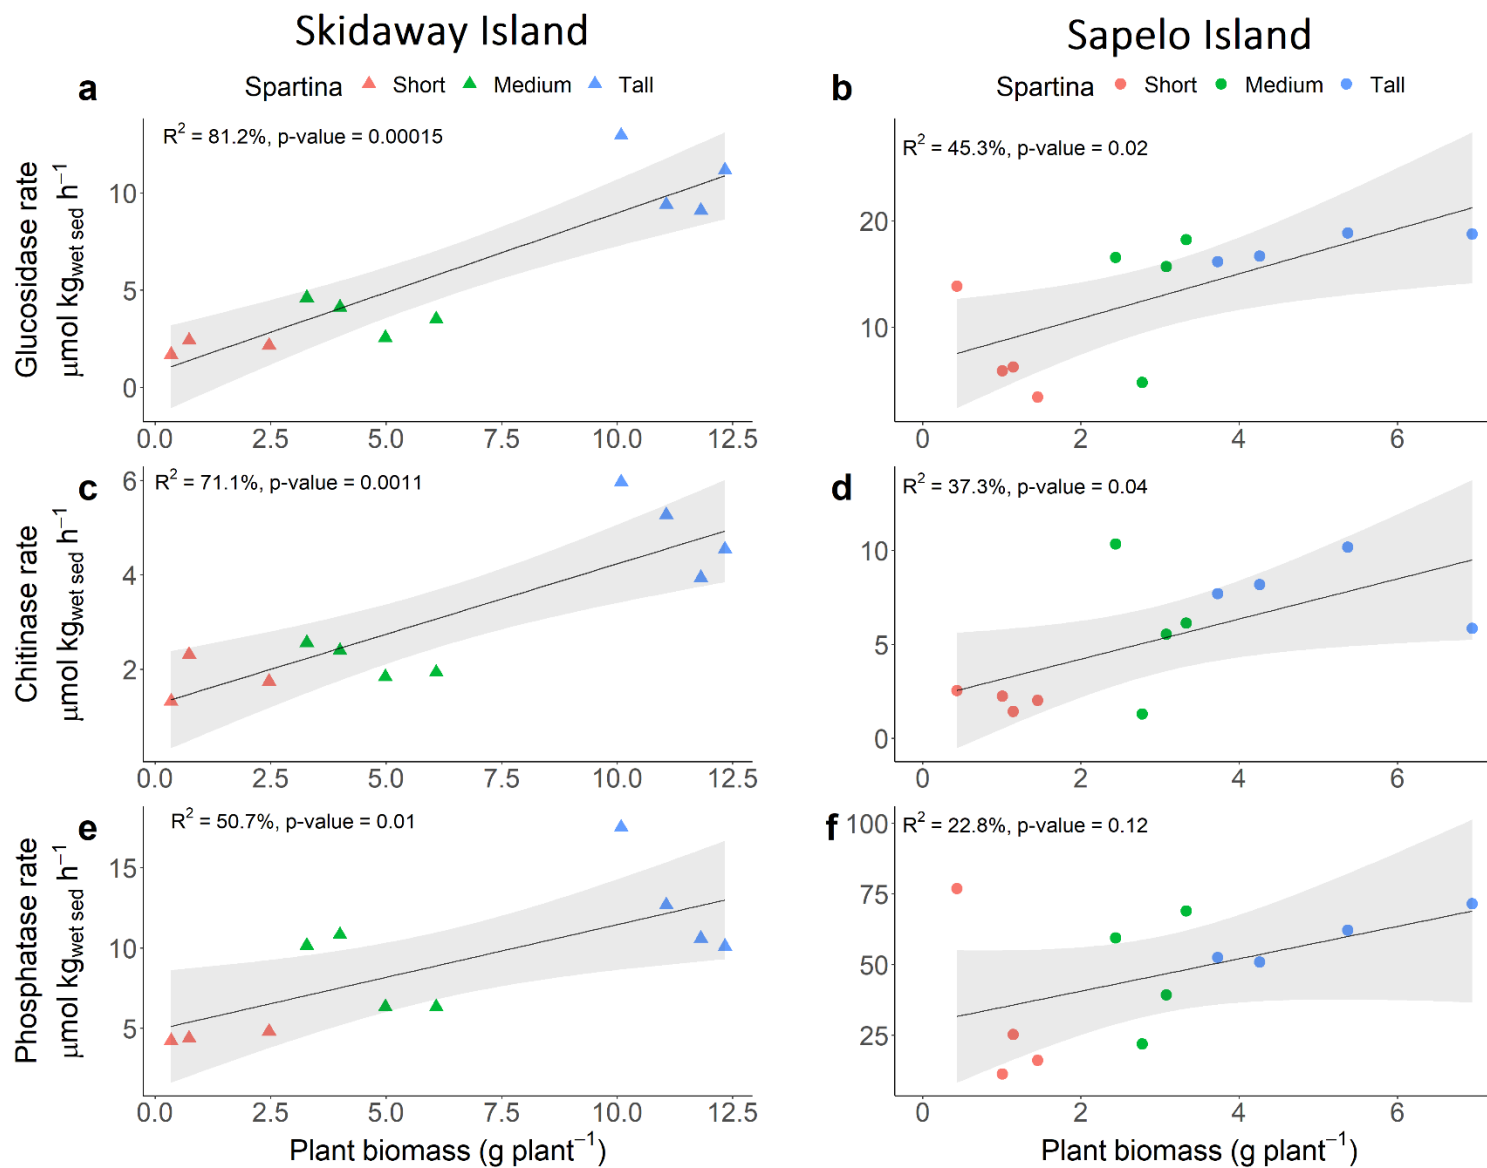

1040 **Figure 3:**

1041

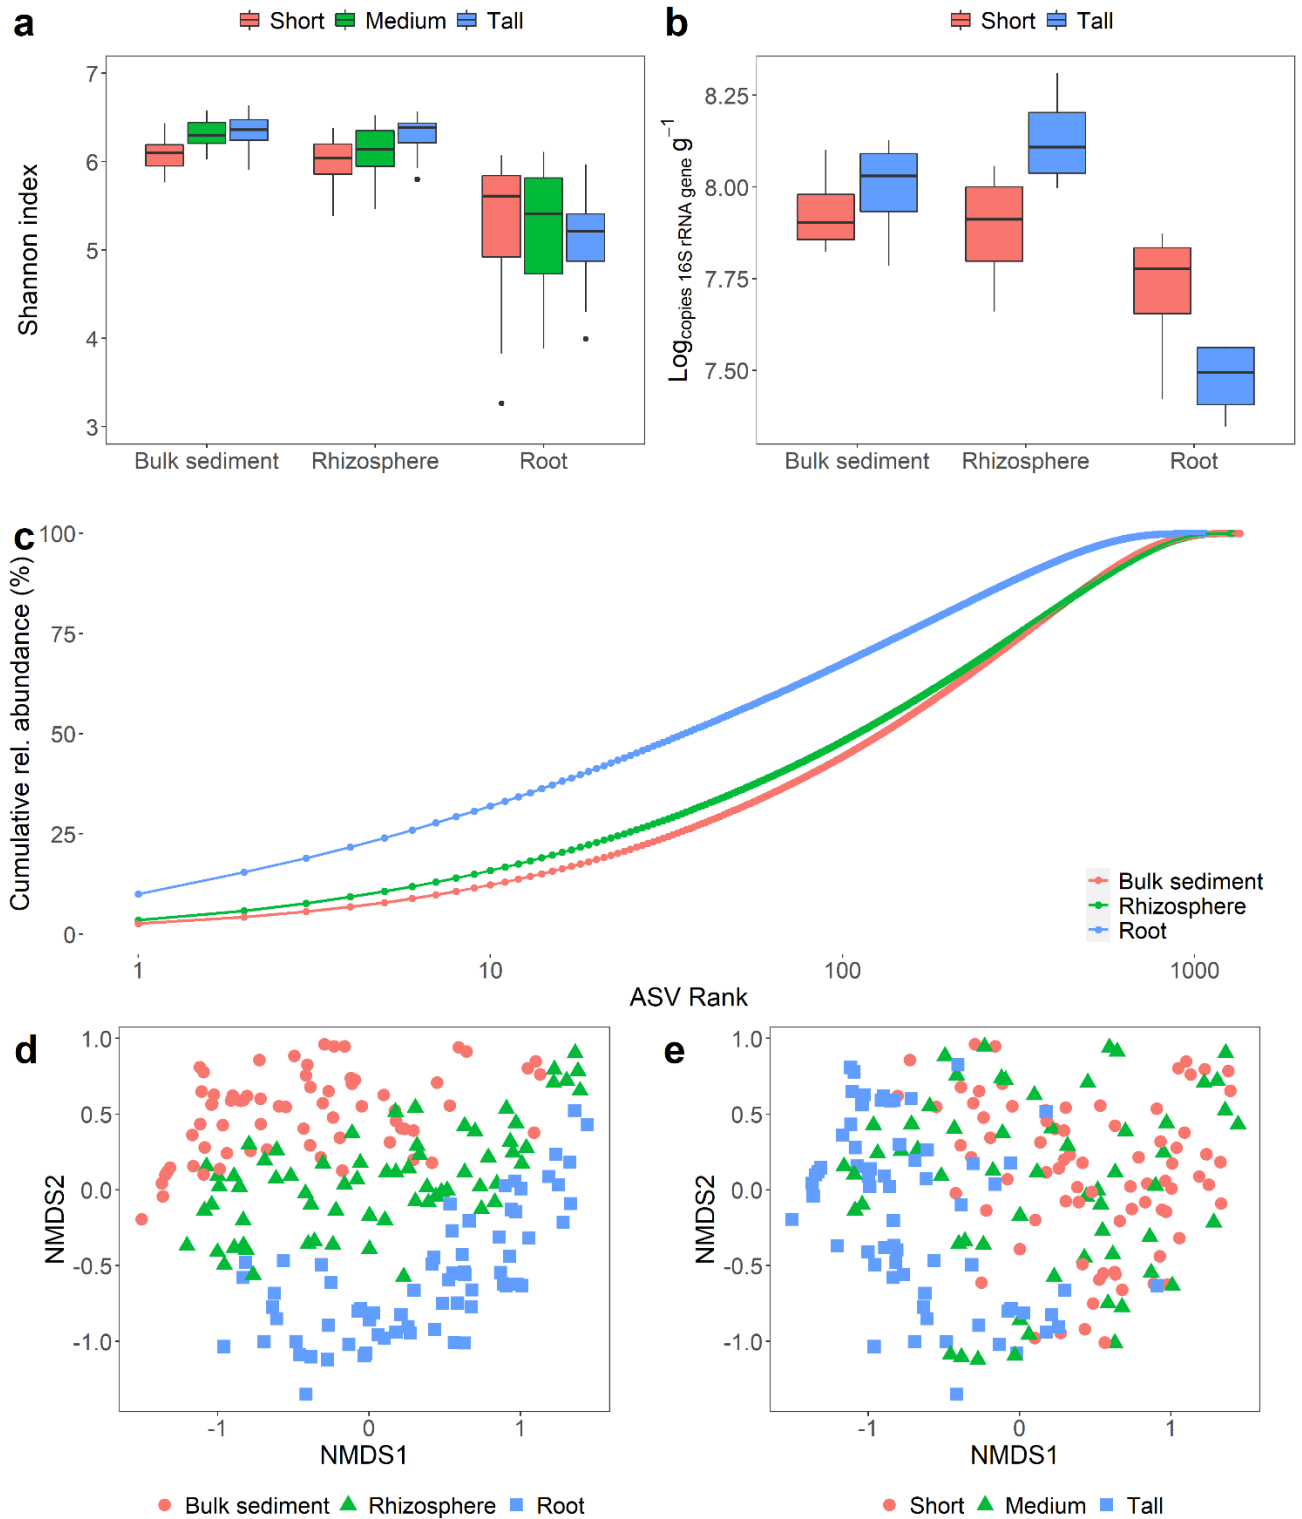

1042

1043 **Figure 4:**

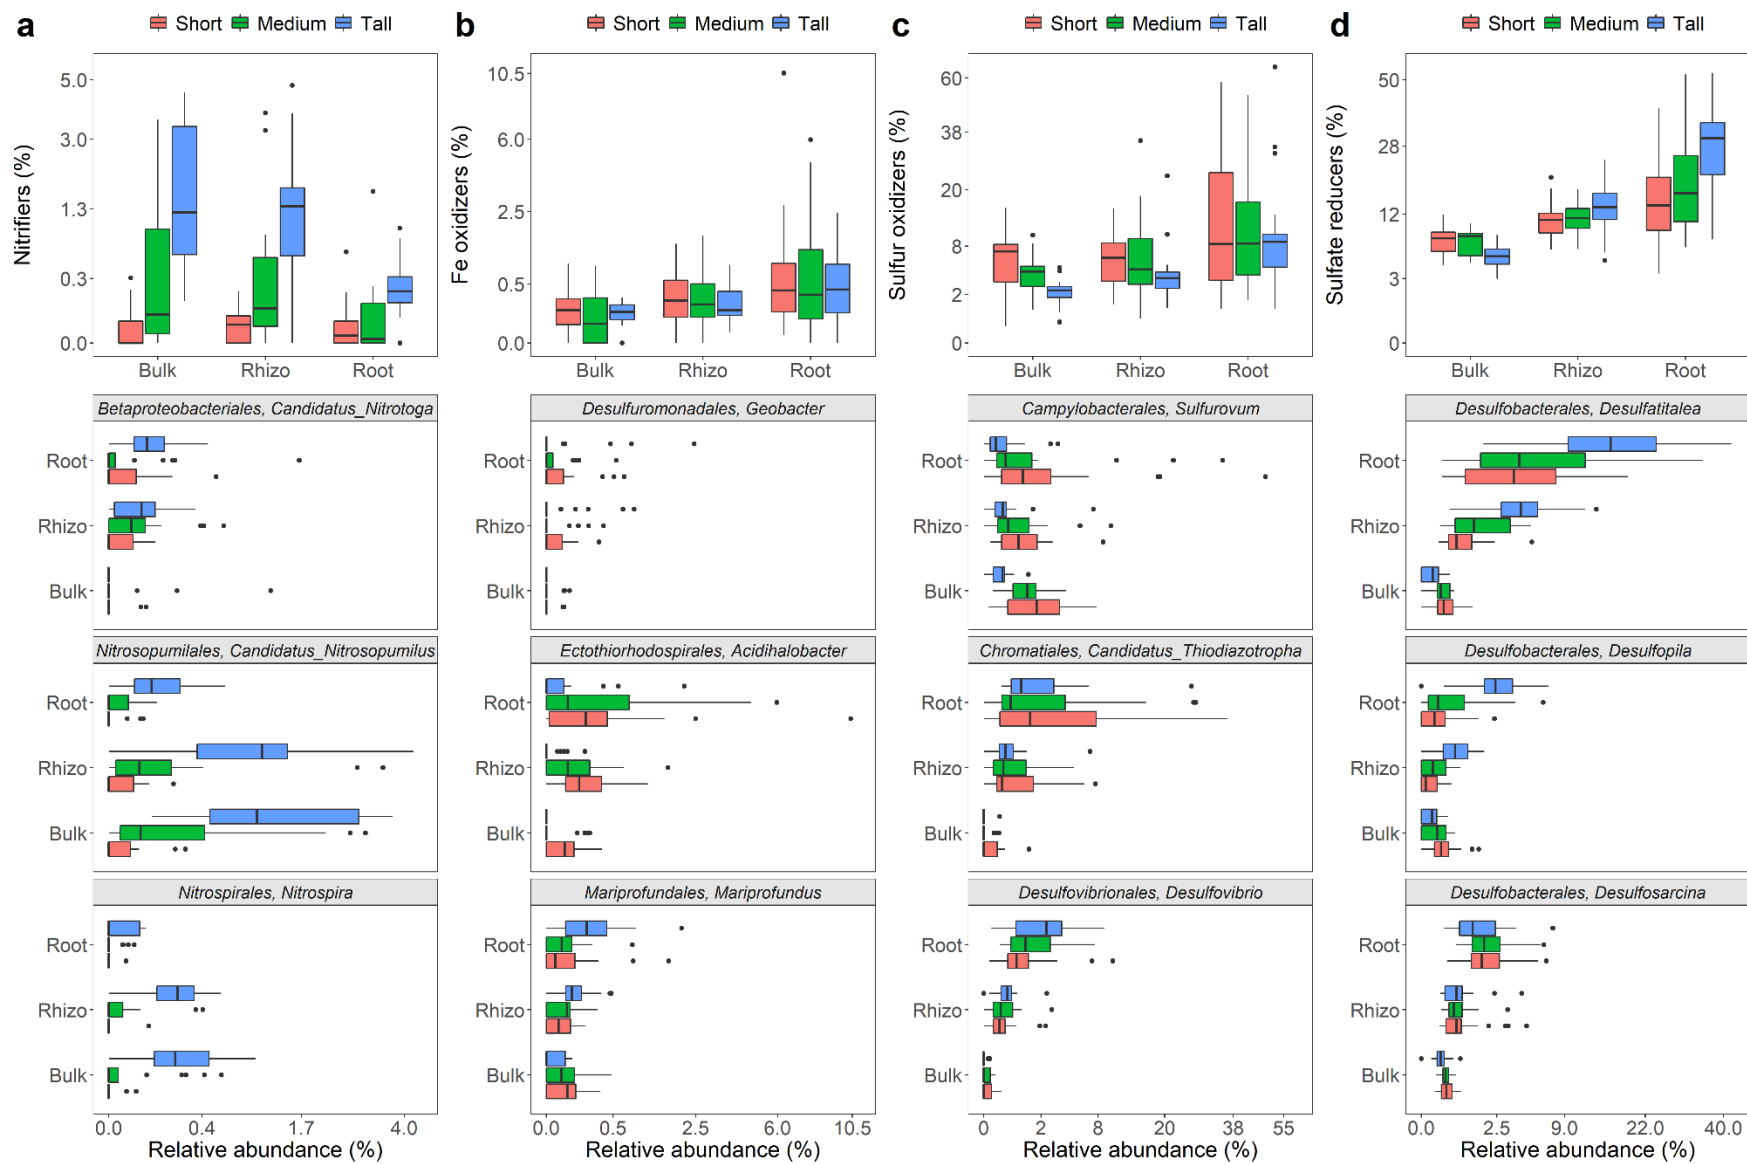

1044

1045 **Figure 5:**

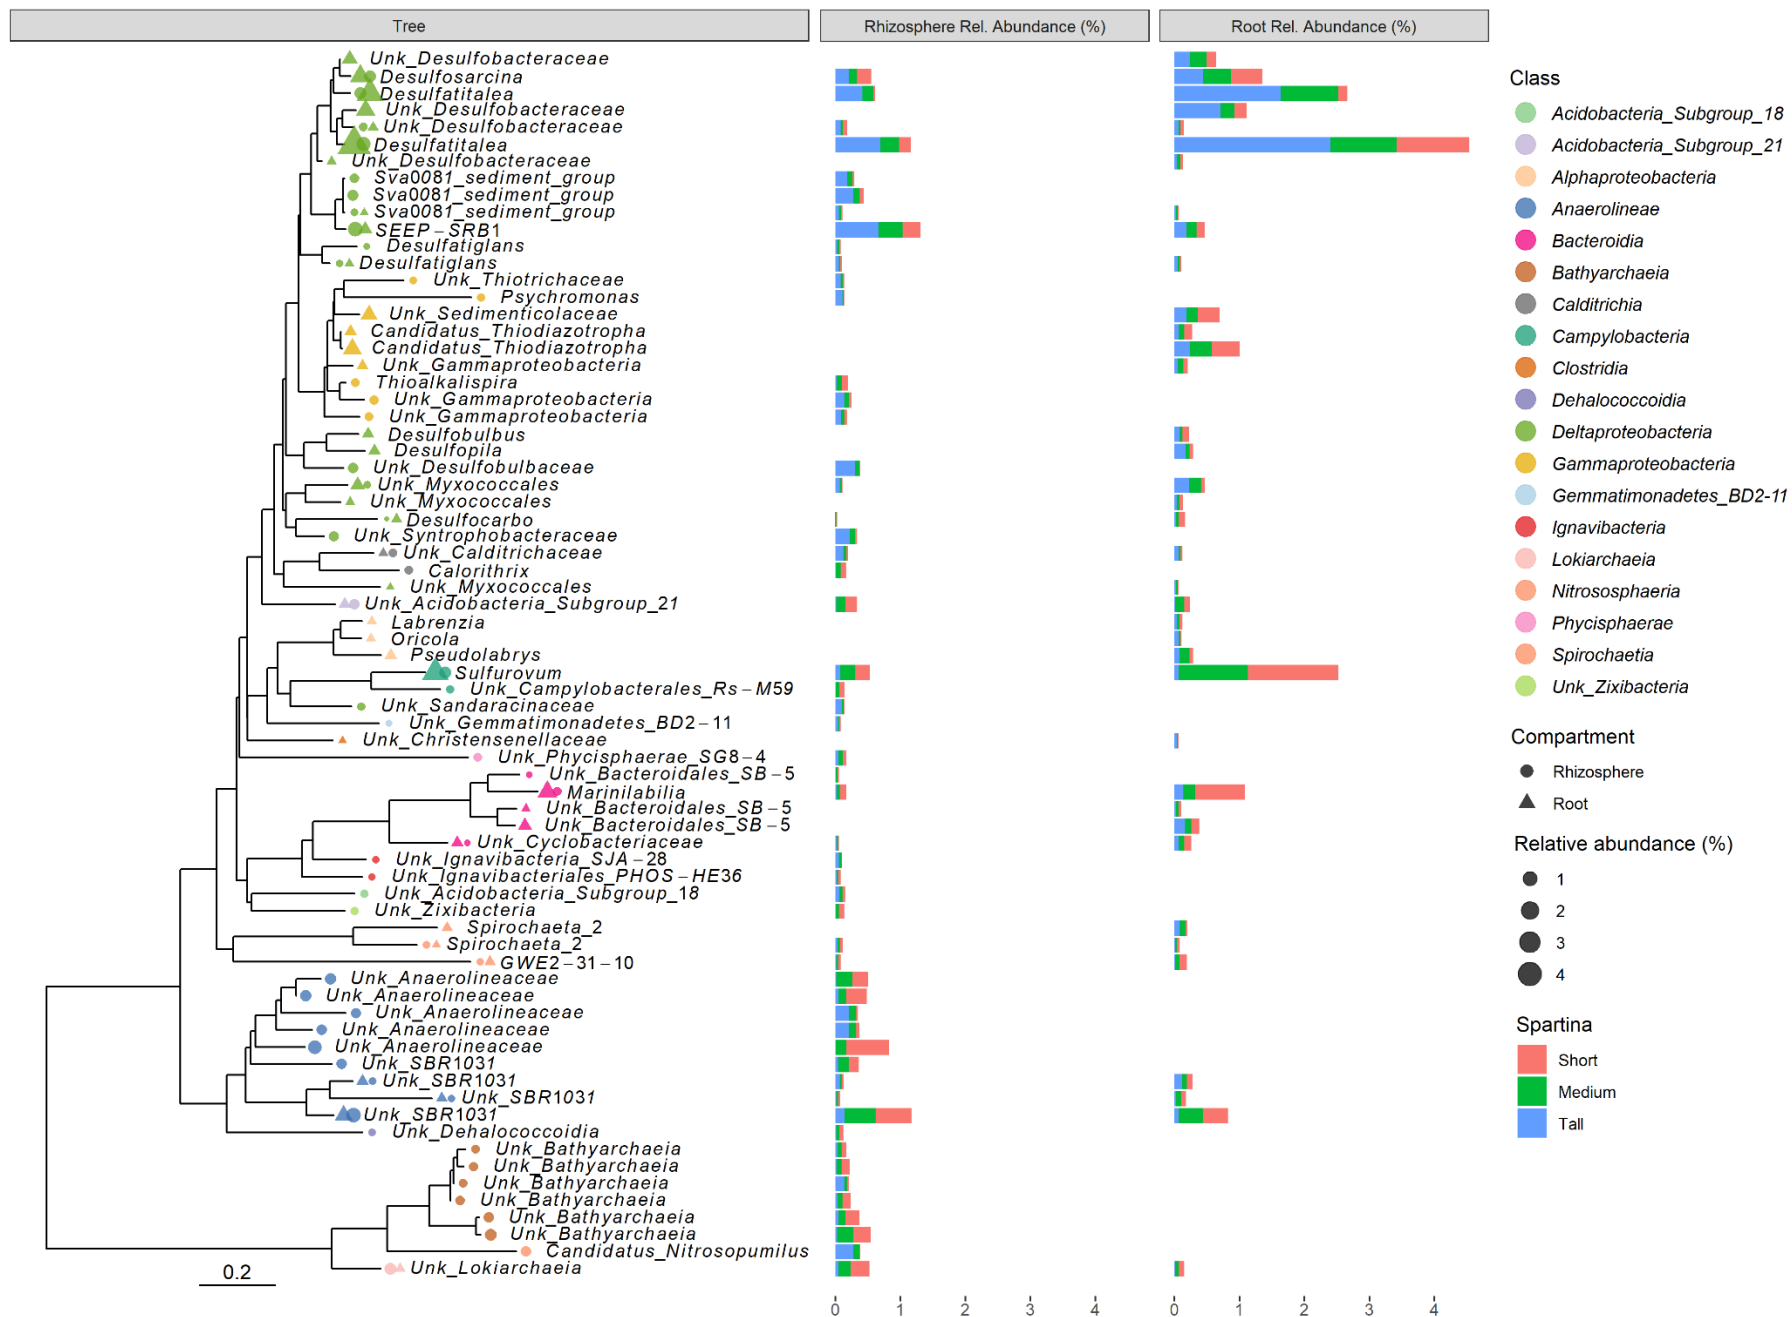

Source: http://biorxiv.org/content/10.1101/2021.07.06.451362v1.full.pdf
